# Supplementary material for: Double-walled Al-based MOF with large microporous specific surface area for trace benzene adsorption
Source: PubMed Central journal article supplement (PMC11016061; doi:10.1038/s41467-024-47612-x), 2024-04-13
Supplement: 41467_2024_47612_MOESM1_ESM.pdf [file 41467_2024_47612_MOESM1_ESM.pdf]

## Supplementary Information

### Double-walled Al-based MOF with large microporous specific surface area for trace benzene adsorption

Laigang Hu <sup>a,c,d</sup>, Wenhao Wu <sup>a,c,d</sup>, Min Hu <sup>a,c,d</sup>, Ling Jiang <sup>a,c,d</sup>, Daohui Lin <sup>a,c,d</sup>,

Jian Wu <sup>a,c,d</sup>, Kun Yang <sup>a,b,c,d\*</sup>

<sup>a</sup> Department of Environmental Science, Zhejiang University, Hangzhou 310058, China;

<sup>b</sup> ZJU-Hangzhou Global Scientific and Technological Innovation Center, Zhejiang University, Hangzhou 311215, China;

<sup>c</sup> Key Laboratory of Environmental Pollution and Ecological Health of Ministry of Education, Hangzhou 310058, China;

<sup>d</sup> Zhejiang Provincial Key Laboratory of Organic Pollution Process and Control, Hangzhou 310058, China;

\* Corresponding author (Kun Yang): Tel.: 86-571-88982589; Fax: 86-571-88982590;

E-mail: [kyang@zju.edu.cn](mailto:kyang@zju.edu.cn)

## Supplementary Notes

### Synthesized CAU-10(Al)

CAU-10(Al) was synthesized according to previous study <sup>1</sup>. In detail, 1,3-H<sub>2</sub>BDC (200 mg, 1.20 mmol) and Al<sub>2</sub>(SO<sub>4</sub>)<sub>3</sub>·18H<sub>2</sub>O (800 mg, 1.20 mmol) were dissolved in the mixture of 1.00 mL DMF and 4.00 mL. Then, the mixture was added into Teflon vessel and heated at 135 °C for 24 h. The product of CAU-10(Al) was collected by centrifugation, and washed with methanol.

The topology, specific surface area, benzene adsorption, internal/exterior hydrophilicity and hydrophobicity of ZJU-520(Al) and CAU-10(Al) are compared in this work. In detail, the topology of CAU-10(Al) and ZJU-520(Al) are all **yfm**. The experimental specific surface area of CAU-10(Al) is 583.45 m<sup>2</sup> g<sup>-1</sup>, calculated from 77 K N<sub>2</sub> adsorption-desorption (Supplementary Fig. 6a), lower than that of ZJU-520(Al) (2235 m<sup>2</sup> g<sup>-1</sup>). The saturation benzene adsorption capacity of ZJU-520(Al) is 12.07 mmol g<sup>-1</sup>, which is 6.07 times that of CAU-10(Al) (1.98 mmol g<sup>-1</sup>) (Supplementary Fig. 6b) at 298 K. Both Al-based MOFs are all with weak internal hydrophobicity, due to their water vapor adsorption isotherms (Supplementary Fig. 6c) belonged to type V <sup>2</sup>. The static water contact angle (WCA) of ZJU-520(Al) and CAU-10(Al) are all close to 0° (Supplementary Fig. 6d,e), suggesting their exterior hydrophilicity.

### N<sub>2</sub> adsorption-desorption measurements

The pore size distribution (PSD) of ZJU-520(Al) was calculated according to the nonlocal density functional theory (NLDFT) model using the geometry of slit <sup>3</sup>. The

total pore volume of sample was obtained from N<sub>2</sub> adsorption-desorption isotherm at 77 K and relative pressure ( $P/P_0$ ) of 0.99.

### **SEM image, EDS mapping and elemental analysis**

Scanning electron microscopy (SEM) images and energy dispersive spectroscopy (EDS) mapping were taken using a Zeiss GIMINI 300 (Germany). Prior to measurement, samples were coated with Pt to ~9 nm thickness in MCI000 ion sputter (HITACHI, Japan). The C, N, H contents of ZJU-520(Al) are obtained from elemental analyzer (Vario MAX cube, Germany), and Al content is measured by S8 Tiger X-ray Fluorescence Spectrometer (Bruker, Germany). The O content of ZJU-520(Al) is obtained by subtracting the content of Al, C, H, and N from 100%.

### **Fourier-transform infrared (FT-IR) spectra analysis**

The functionalized groups of ZJU-520(Al) and H<sub>2</sub>DBP were collected from 400 ~ 4000 cm<sup>-1</sup> on Bruker-vector-22 by Fourier-transform infrared spectra method. The samples of ZJU-520(Al) (1.00 mg) and H<sub>2</sub>DBP (1.05 mg) were mixed with KBr using the agate mortar, then ground and compressed into circular flakes to FT-IR analysis<sup>4</sup>, respectively.

### **Static adsorption of BTEX, cyclohexane and water vapor**

The static adsorption of vapors was measured by JW-ZQ100 vapor adsorption instrument equipped with steam generation unit and heating unit. The heating unit of instrument was utilized to maintain the temperature of steam generation unit at 313 K, ensuring the consistent and continuous production of steam<sup>5</sup>. The temperature of

adsorbate samples was kept in the adsorption process, using the heating in water bath methods. Before the measurement, the samples were outgassed at 378 K (105 °C) for 24 h to remove the guest molecules in the pore structure of adsorbent.

To calculate the benzene/cyclohexane (Bz/Cy) separation of ZJU-520(Al), the Dual-site Langmuir-Freundlich (DSLFL) model <sup>6</sup>, Equation (S1), was chosen to fit the single-component adsorption isotherms of benzene and cyclohexane at 298 K.

$$Q_m = Q_{m1} \frac{b_1 p^n}{1 + b_1 p^n} + Q_{m2} \frac{b_2 p^m}{1 + b_2 p^m} \quad (\text{S1})$$

Where  $Q_m$  is the adsorbed amount, mmol g<sup>-1</sup>;  $Q_{mi (i=1,2)}$  is the saturation adsorption capacity, mmol g<sup>-1</sup>;  $p$  is the equilibrium pressure of gas, kPa;  $b_{i(i=1,2)}$  is the affinity coefficient, kPa<sup>-1</sup>;  $n$  and  $m$  are the deviations.

Adsorption selectivity for Bz/Cy gas mixture on ZJU-520(Al) at 298 K was calculated by ideal adsorbed solution theory (IAST) <sup>7</sup>.

$$S = \frac{x_1/y_1}{x_2/y_2} \quad (\text{S2})$$

Where  $x_i$  and  $y_i$  are the molar fractions of components in the adsorbed and bulk phase.

We assume that the pore volume of activated ZJU-520(Al) is fully occupied by adsorbents, such as benzene and cyclohexane. The maximum benzene and cyclohexane adsorption by ZJU-520(Al) are predicted by the following Equation (S3):



$$Q_{max} = \rho_{adsorbate} \times PV \div M \times 1000 \quad (S3)$$

Where  $\rho$  is the density of adsorbates, such as benzene (0.8765 g cm<sup>-3</sup>) and cyclohexane (0.7739 g cm<sup>-3</sup>);  $PV$  is the void pore volume of adsorbent, cm<sup>3</sup> g<sup>-1</sup>;  $M$  is the molecular weight, g mol<sup>-1</sup>;  $Q_{max}$  is the calculated maximum adsorbate adsorption, mmol g<sup>-1</sup>.

### Isosteric heat of adsorption

Isosteric heat of adsorption on ZJU-520(Al) was calculated from Clausius-Clapeyron equation<sup>8</sup> to predict the interaction between adsorbates and adsorbent, using the adsorption isotherms of adsorbates at 288, 298 and 308 K.

$$\ln P = -\frac{\Delta H_s}{R \times T} + C \quad (S4)$$

Where  $P$  is the pressure;  $R$  is the ideal gas constant, 8.314 kJ mol<sup>-1</sup>;  $C$  is the constant;  $T$  is the temperature, K;  $\Delta H_s$  is calculated from slopes of plots of  $\ln P$  versus  $1/T$  of fixed loading.

### Dynamic breakthrough experiment

Humid breakthrough experiment of ZJU-520(Al) is also performed. The activated ZJU-520(Al) (200 mg) is also put into the fixed bed. The first N<sub>2</sub> gas is used to bubble the benzene liquid. The water vapor is generated by bubbling N<sub>2</sub> through deionized water. The humidity of gaseous mixture is detected by hygrometer in the mixing vessel. The total gas flow rate is controlled at 30 mL min<sup>-1</sup>. The outlet concentration of benzene

in the humid/dry breakthrough curves, such as 10 and 1000 ppm, are detected by gas chromatography at the same time interval.

The saturated adsorption capacities of benzene for adsorbents were calculated via the integral of the breakthrough curves, respectively, as shown in Equation (S5).

$$Q = \frac{F \times 10^{-6}}{m} \times \left( C_0 \times t - \int_0^t C_t dt \right) \quad (\text{S5})$$

Where  $Q$  is the equilibrium adsorption capacity,  $\text{mg g}^{-1}$ ;  $F$  is the total flow rate of the gas,  $\text{mL min}^{-1}$ ;  $m$  is the mass of the adsorbent,  $\text{g}$ ;  $C_0$  is the initial concentration of benzene at the inlet,  $\text{mg m}^{-3}$ ;  $C_t$  is the benzene concentration at the outlet after adsorption for  $t$  minutes,  $\text{mg m}^{-3}$ ;  $t$  is the adsorption time,  $\text{min}$ .

#### **Powder X-ray diffraction (PXRD) analysis.**

PXRD patterns of ZJU-520(Al) were collected on the diffractometer (D8 ADVANCE, Bruker, Germany) equipped with Cu sealed tube ( $\text{CuK}\alpha 1$  radiation,  $\lambda=1.5418 \text{ \AA}$ ) at 40 kV and 40 mA to characterize crystallinity of synthesized materials. The intensity data of samples was collected from  $2^\circ$  to  $50^\circ$  with a scan step size of  $0.02^\circ$ . The refinement of ZJU-520(Al) structure was performed on the software of GASA II<sup>9</sup>.

#### **Single Crystal X-ray diffraction analysis**

Single Crystal X-ray diffraction (SC-XRD) data of as-synthesized ZJU-520(Al) crystal, with crystal size of  $0.10 \times 0.02 \times 0.02 \text{ mm}$  (Supplementary Fig. 1), was collected at 100.15 K using the Bruker D8 Venture diffractor equipped with the PHOTON II detector, Cryostream 80–400 K (Oxford Cryosystems, United Kingdom), and  $\text{CuK}\alpha$  ( $\lambda=1.54178 \text{ \AA}$ )  $I\mu S$  microfocus X-ray source with MX Optics and a Kappa

geometry goniometer. The rod-shaped crystal was obtained from mother solution, mounted on the MicroMesh (MiTeGen) with paratone oil. The space group of ZJU-520(Al) belonged to  $I4_1md$ , solved by SIR2008<sup>10, 11</sup>. Moreover, the structure of ZJU-520(Al) was determined by intrinsic phasing (SHELXT<sup>12</sup>) and refined by full-matrix least-squares refinement on  $F^2$  (SHELXL) using Olex2 software package<sup>13, 14</sup>. The crystal data of ZJU-520(Al) without guest molecules are obtained from the ZJU-520(Al) with guest molecules (as-synthesized ZJU-520(Al)) by removing the guest solvent molecules, using PLATON SQUEEZE program<sup>15, 16</sup>. Refinement results and details of collected data on ZJU-520(Al) with and without solvent molecules were summarized in Supplementary Table 1, obtained from Olex2 software package. In addition, the selected bond length and angle were also summarized in Supplementary Table 2–3. The SC-XRD data of ZJU-520(Al), containing the crystallographic data for this paper, was deposited in the Cambridge Crystallographic Data Centre (CCDC) database under deposition number CCDC 2288227.

### **Molecular simulations**

Grand Canonical Monte Carlo (GCMC) simulations were carried out on the software of RASPA 2.0<sup>17</sup> to investigate the vapor adsorption process on ZJU-520(Al). Before GCMC simulations, Helium (He) void fraction (HVF) of ZJU-520(Al) was calculated (ca. 0.64), using He as the probe according to Widom insertions method<sup>17, 18</sup>. Crystal structure of ZJU-520(Al), obtained from SC-XRD analysis, was without further geometry optimization for related simulations and kept rigid during the process

of simulation. The theoretical specific surface area and pore volume of ZJU-520(AI) were also obtained from GCMC simulations, using nitrogen (N<sub>2</sub>) as probe (1.84 Å) at 77 K<sup>19</sup>. Each point, in simulated adsorption isotherms, consisted of 10,000 initialization cycles and 10,000 production cycles. The adsorbate molecules could be translation, rotation, insertion and deletion in the framework of ZJU-520(AI). The interaction energies, such as van der Waals interaction, between adsorbate-framework were calculated through Lennard-Jones (LJ) potential<sup>20</sup>, using the 12.5 Å cutoff to handle the nonbonding interactions<sup>7, 21</sup>. The adsorption temperature was set as 298 K. Furthermore, the density-derived electrostatic and chemical (DDEC) charges of ZJU-520(AI) with period framework were calculated through periodic density functional theory (DFT) methods, using Chargemol software<sup>22, 23</sup>. Restrained electrostatic potential (RESP) charges<sup>24, 25</sup> of adsorbates, such as benzene and cyclohexane, are calculated. Ewald & Group summation method was used to calculate the electrostatic interactions between adsorbate-framework. Universal force-field<sup>26</sup> and Dreiding force-field<sup>27</sup> were used to describe the LJ parameters of framework metal and nonmetal atoms, respectively. For adsorbate molecules, the LJ parameters were obtained from the TraPPE force-field<sup>28</sup>. The 4×4×4 supercells of ZJU-520(AI) were used to simulation adsorption at 298 K. The calculated excess adsorption of adsorbent compared with the experimental adsorption, was obtained from Equation (S6)<sup>29 30</sup>.

$$N_{exc}=N_{abs} -V_p \times \rho_{bulk} \quad (S6)$$

Where  $N_{abs}$  is the absolute adsorption, containing the amount of gas adsorbed in the pore volume in the presence of pore walls,  $\text{mmol g}^{-1}$ ;  $N_{exc}$  is the excess adsorption capacity,  $\text{mmol g}^{-1}$ ;  $V_p$  is the pore volume of adsorbent,  $\text{cm}^3 \text{g}^{-1}$ ;  $\rho_{bulk}$  is the bulk density of adsorbate molecule,  $\text{g cm}^{-3}$ .

Besides, the single-walled ZJU-520(Al) is built by removing half of ligand of double-walled ZJU-520(Al). The open metal sites (OMS) of single-walled ZJU-520(Al) is sealed by C atoms to avoid the function of OMS for benzene adsorption<sup>31</sup>, listed in Supplementary Fig. 21. GCMC simulation of single-walled ZJU-520(Al) is in the same condition as double-walled ZJU-520(Al).

### **Density functional theory (DFT) calculations**

Density functional theory (DFT) calculations were implemented for investigating the adsorption energy and electronic density of benzene molecule and ZJU-520(Al) with and without benzene, after optimization structure, using the software of CP2K<sup>32</sup>.<sup>33</sup> The input files of CP2K calculation tasks were generated by Multiwfn software<sup>34</sup>. In detail, the theoretical method of Perdew, Burke and Ernzerhof (PBE) exchange-correlation function was applied with Generalized Gradient Approximation (GGA)<sup>35-37</sup>. The plane wave cutoff energy of this system was set to 400 Ry, with the relative cutoff of 50 Ry and progression factor of 3, according to the previous study<sup>38,39</sup>. DFT-D3 scheme with semiempirical dispersion corrections<sup>40,41</sup> was used to compensate the weak interaction, such as the long-range van der Waals dispersion interaction<sup>42</sup> between adsorbate and the skeleton of ZJU-520(Al). The norm-conserving

Goedecker–Teter–Hutter (GTH) pseudopotential <sup>43</sup> and double- $\zeta$  valence polarized basis set (DZVP-MOLOPT-SR-GTH) <sup>44, 45</sup> were employed for DFT calculation. The binding energy of adsorbed benzene on ZJU-520(Al) was calculated, according to Equation (S7) <sup>46</sup>. The isosurfaces of charge density difference on ZJU-520(Al) with benzene molecules in site I, site II and center, were calculated by Equation (S8) <sup>47</sup>.

$$\Delta E_{ads} = E_{Benzene@ZJU-520(Al)} - (E_{Benzene} + E_{ZJU-520(Al)}) \quad (S7)$$

Where  $E_{Benzene@ZJU-520(Al)}$  is the total energy of ZJU-520(Al) with adsorbed benzene molecule in the equilibrium state,  $\text{kJ mol}^{-1}$ ;  $E_{Benzene}$  is the energy of benzene,  $\text{kJ mol}^{-1}$ ;  $E_{ZJU-520(Al)}$  is the energy of ZJU-520(Al) without adsorbed benzene molecules,  $\text{kJ mol}^{-1}$ ;  $\Delta E_{ads}$  is the binding energy of adsorbed benzene molecule on ZJU-520(Al).

$$\Delta\rho = \rho_{Benzene@ZJU-520(Al)} - (\rho_{Benzene} + \rho_{ZJU-520(Al)}) \quad (S8)$$

Where  $\rho_{Benzene@ZJU-520(Al)}$  is the charge density of ZJU-520(Al) with benzene, such as benzene molecule in site I, site II and center;  $\rho_{Benzene}$  is the charge density of benzene;  $\rho_{ZJU-520(Al)}$  is the charge density of ZJU-520(Al) without benzene;  $\Delta\rho$  is the charge density difference of ZJU-520(Al) with benzene.

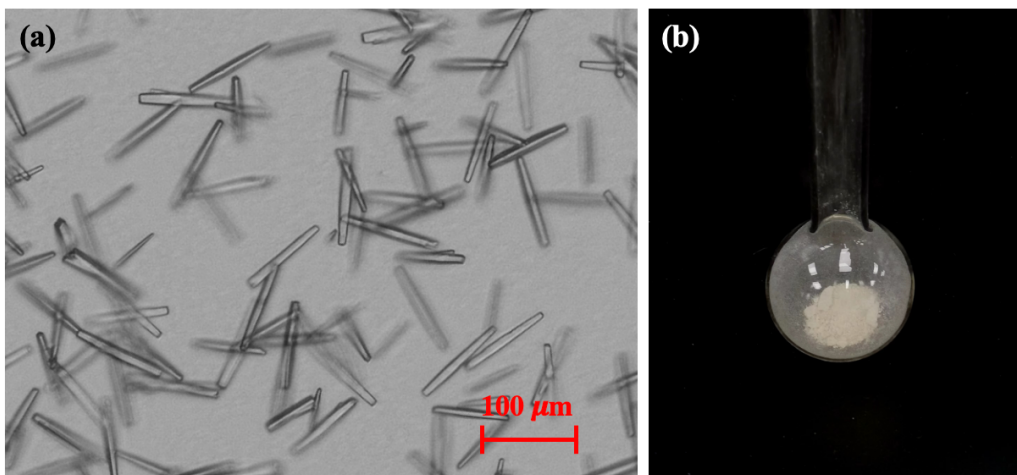

**Supplementary Fig. 1** Optical photo of ZJU-520(Al) crystals (a) and white powder (b).

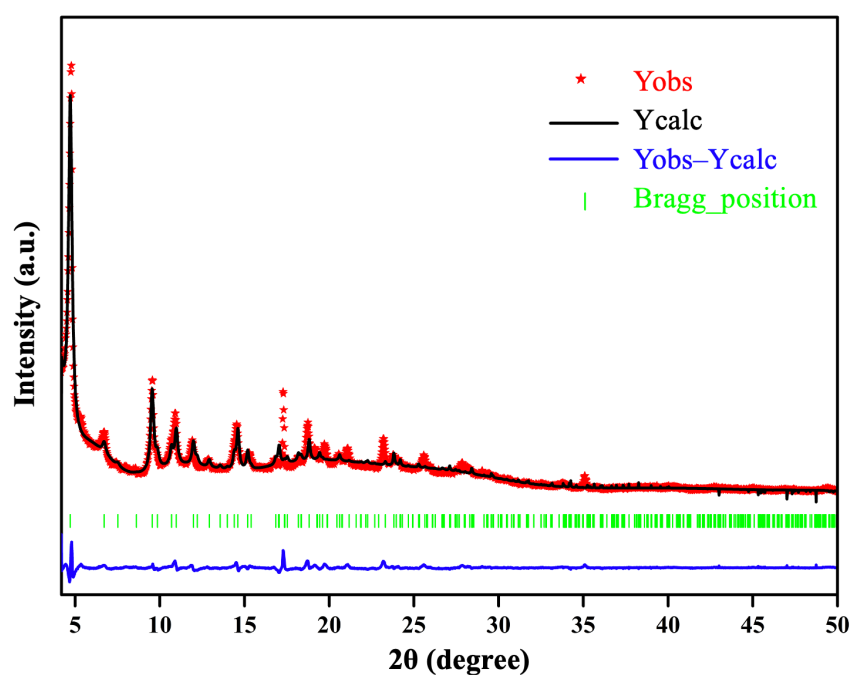

**Supplementary Fig. 2** Experimental PXRD patterns of as-synthesized ZJU-520(Al) compared with simulated ZJU-520(Al) diffraction pattern ( $\lambda = 1.5418 \text{ \AA}$ ). Observed ( $Y_{\text{obs}}$ , in red point) and calculated ( $Y_{\text{calc}}$ , in black line) PXRD patterns and different plot (in blue line) for the Rietveld refinement of ZJU-520(Al). The green vertical bars correspond to the position of Bragg peaks.

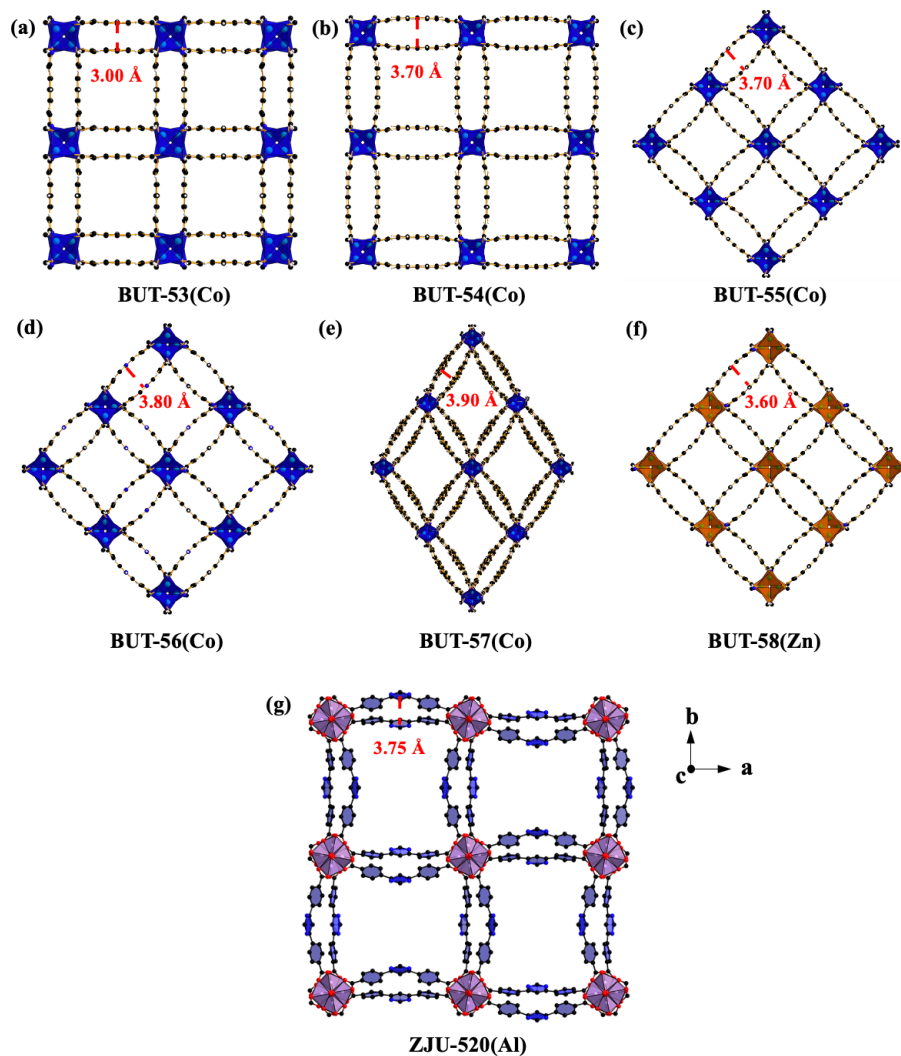

**Supplementary Fig. 3** The distance of double-wall on BUT-53 to BUT-58 and ZJU-520(Al), as viewed from c axis.

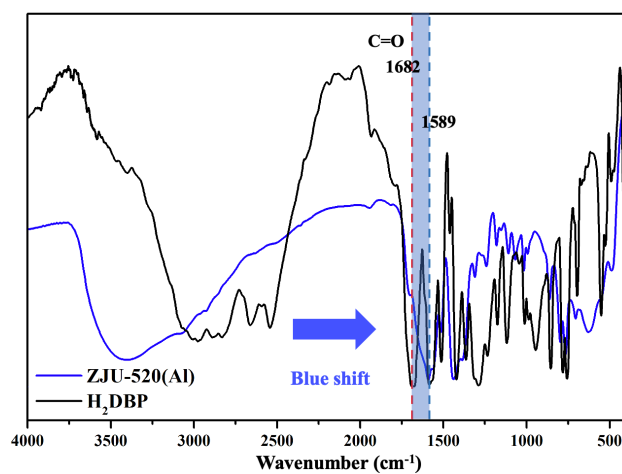

**Supplementary Fig. 4** FT-IR spectra of activated ZJU-520(Al) (in blue line) and H<sub>2</sub>DBP ligand (in black line).



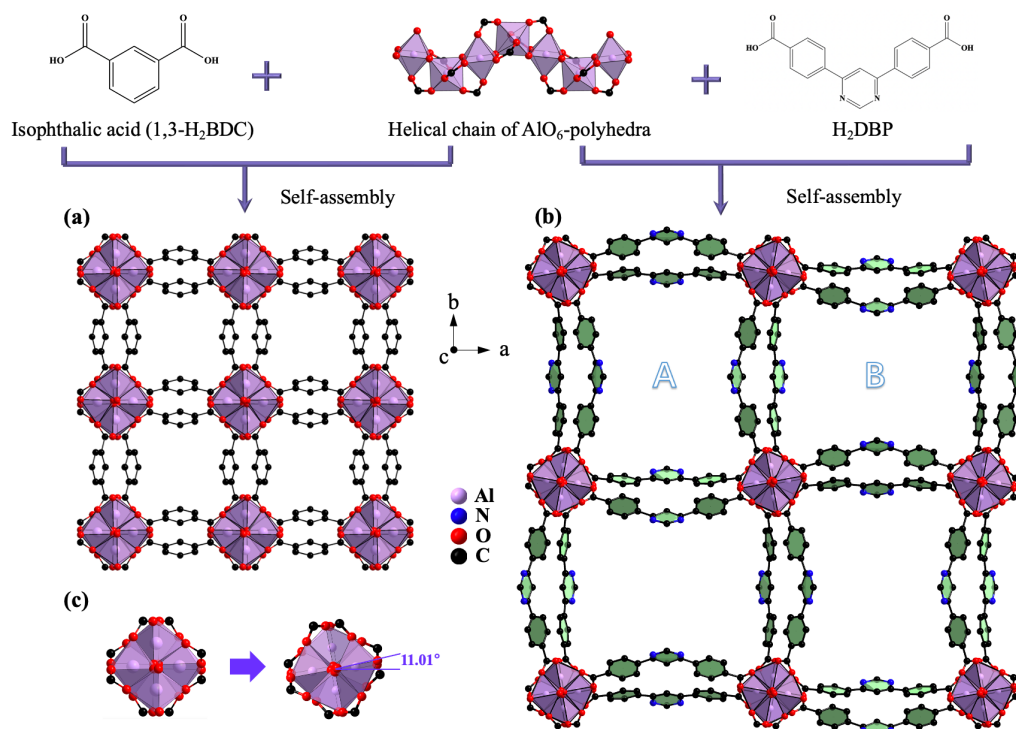

**Supplementary Fig. 5** Structure description of CAU-10(Al) (a) and ZJU-520(Al) (b). The AlO<sub>6</sub> cluster of ZJU-520(Al) with the rotation about 11.01 degree (c), compared with that of CAU-10(Al), as viewed from c axis.

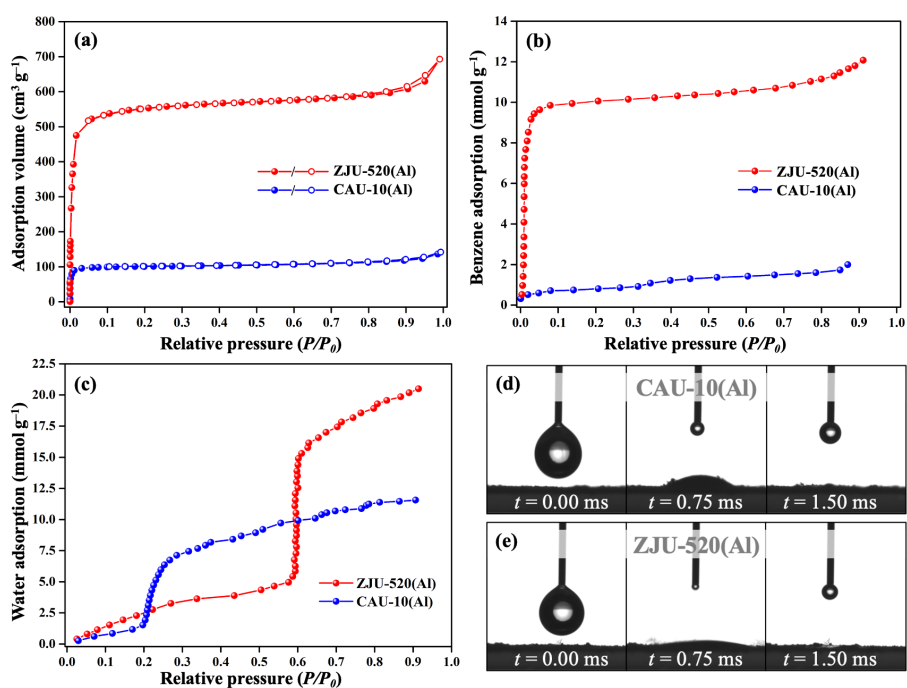

**Supplementary Fig. 6** N<sub>2</sub> adsorption-desorption isotherms at 77 K (a), benzene adsorption isotherms (b) at 298 K and water adsorption isotherms (c) at 298 K, and water contact angle of CAU-10(Al) (d) and ZJU-520(Al) (e).

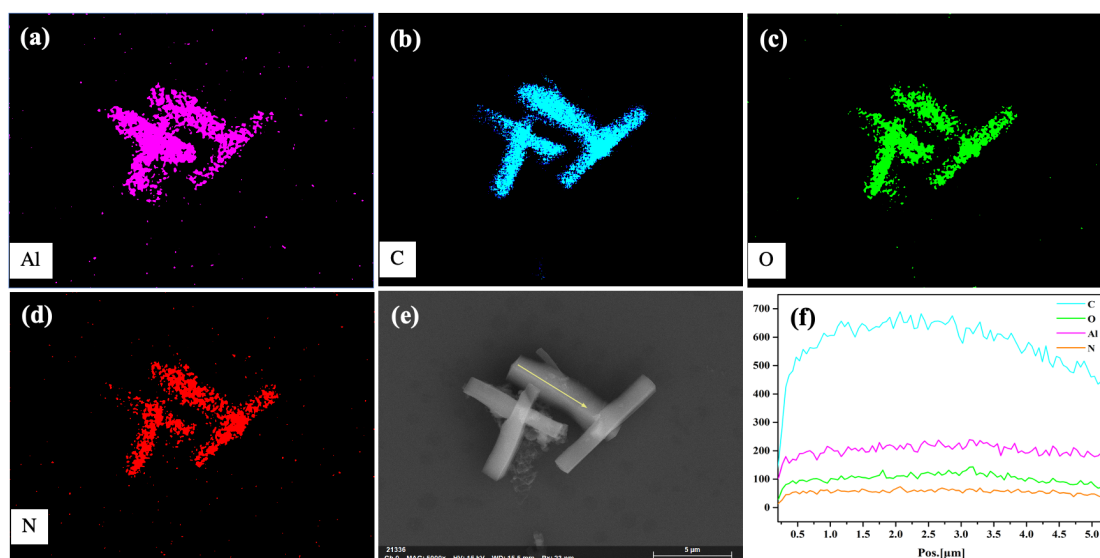

**Supplementary Fig. 7** Elemental energy dispersive spectroscopy (EDS) spectral mapping, including Al (a), C (b), O (c) and N (d), SEM image (e), EDS linear scans (f) of ZJU-520(Al).

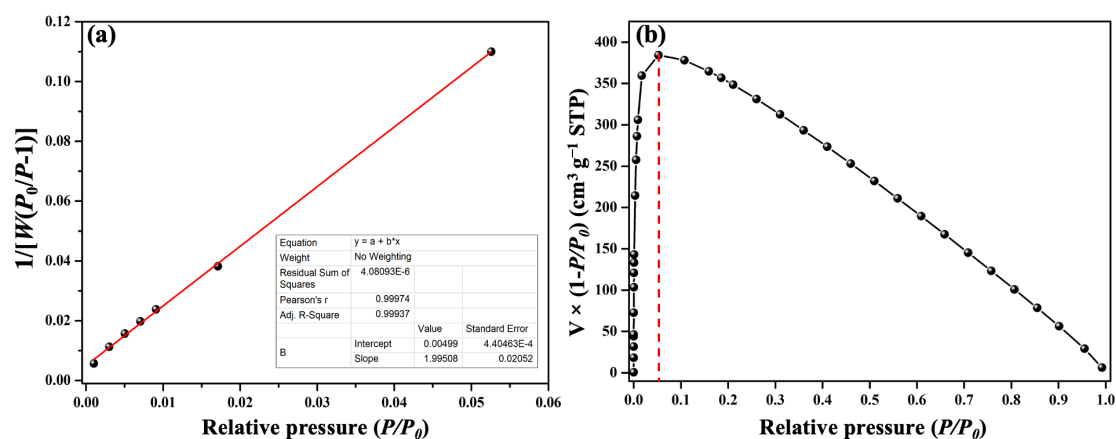

**Supplementary Fig. 8** Linear Brunauer-Emmett-Teller (BET) plot (a) and Rouquerol plot (b), *i.e.*,  $V \times (1 - P/P_0)$  vs  $P/P_0$ , of ZJU-520(Al) from  $N_2$  adsorption-desorption isotherm. The specific surface area of ZJU-520(Al) was calculated by BET method in the range of 0.001 – 0.053.

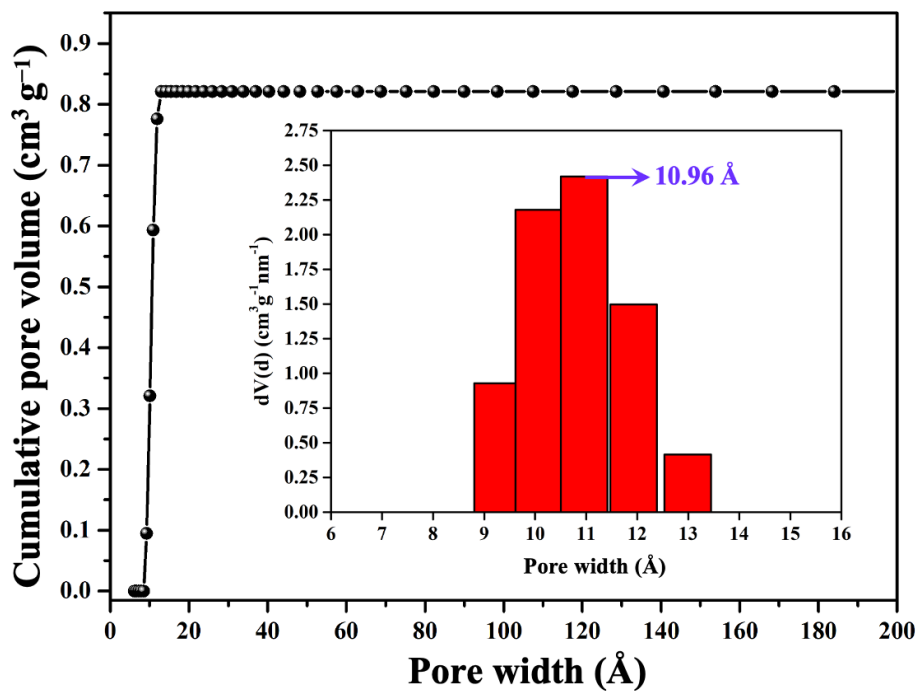

Supplementary Fig. 9 Cumulative pore volume curve and inset PSD plot of ZJU-520(AI).

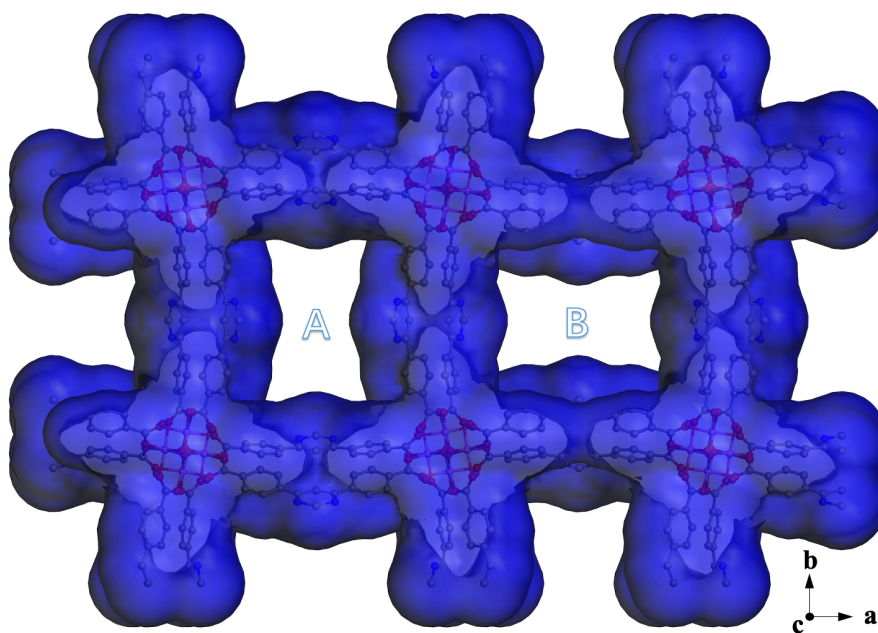

Supplementary Fig. 10 Two types of microporous channels, named as A and B, using  $N_2$  as probe, as viewed from c axis.

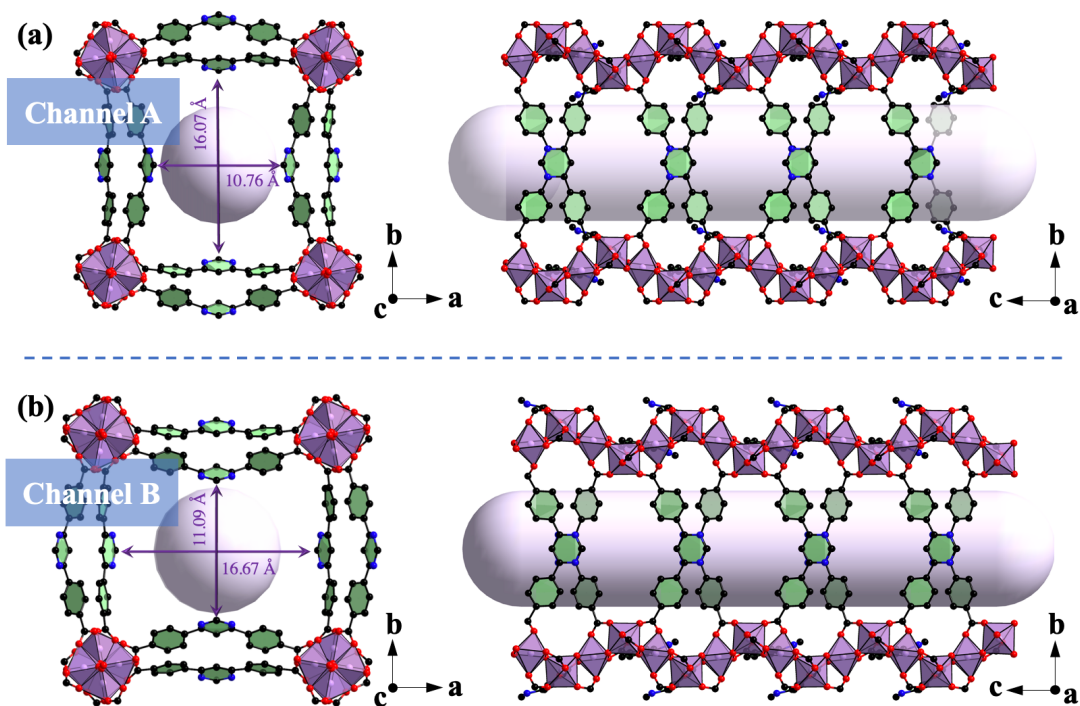

**Supplementary Fig. 11** Pore structures of ZJU-520(Al), including channel A (a) and B (b).

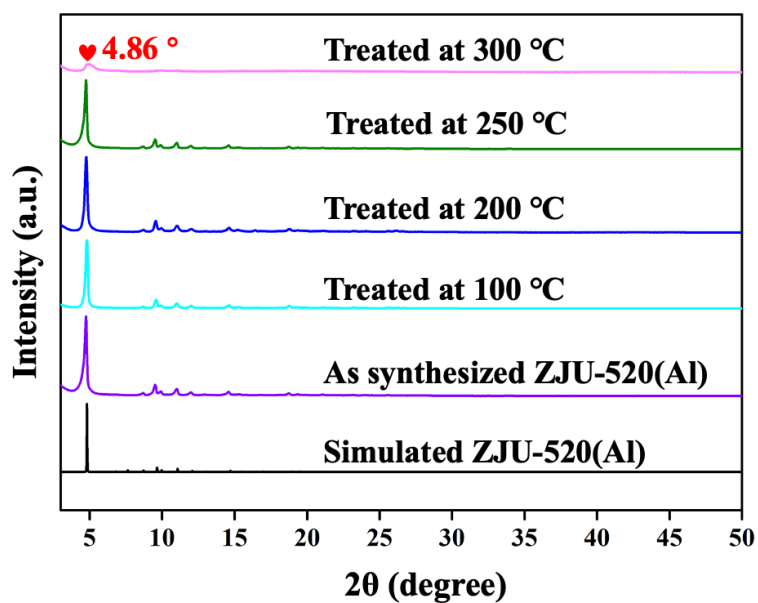

**Supplementary Fig. 12** Temperature-variable PXRD patterns of ZJU-520(Al) at 100, 200, 250 and 300 °C.

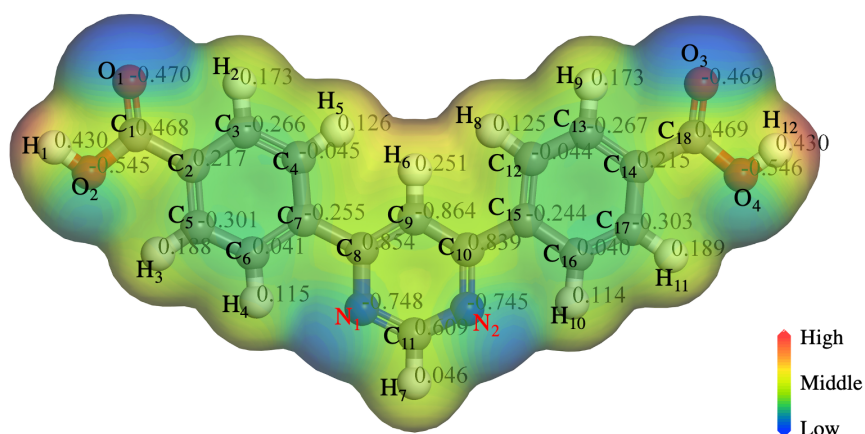

**Supplementary Fig. 13** Restrained electrostatic potential (RESP) charge distributions of H<sub>2</sub>DBP ligand.

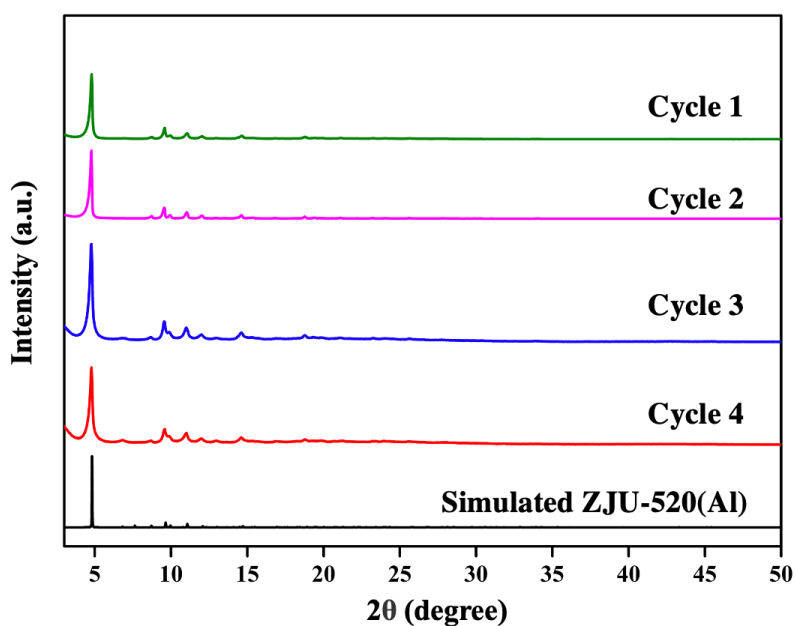

**Supplementary Fig. 14** PXRD patterns of ZJU-520(Al) after cyclical benzene adsorption experiments, in comparison with simulated PXRD patterns of ZJU-520(Al), using the same samples for benzene adsorption after degassed at 378 K for 4 hours.

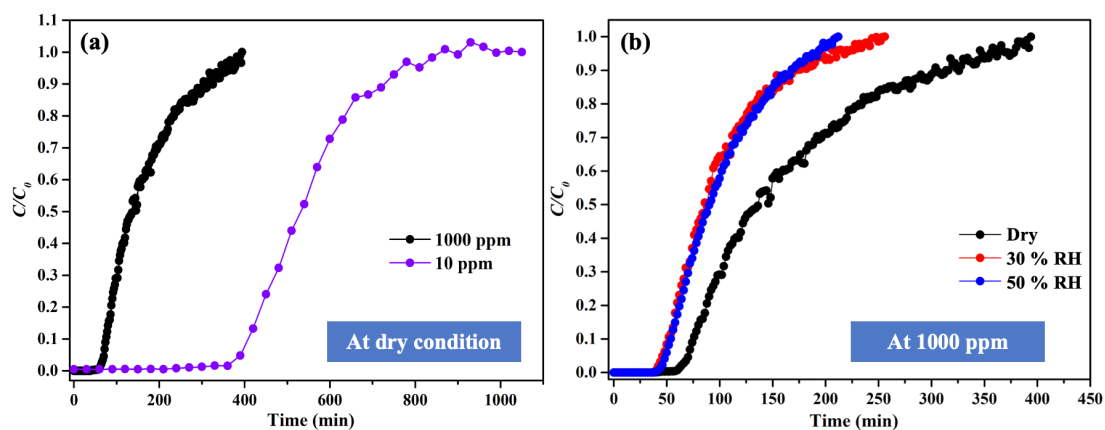

**Supplementary Fig. 15** Breakthrough curves of 10, 1000 ppm benzene on ZJU-520(Al) (a) and 1000 ppm benzene at dry, 30% and 50% RH (b).

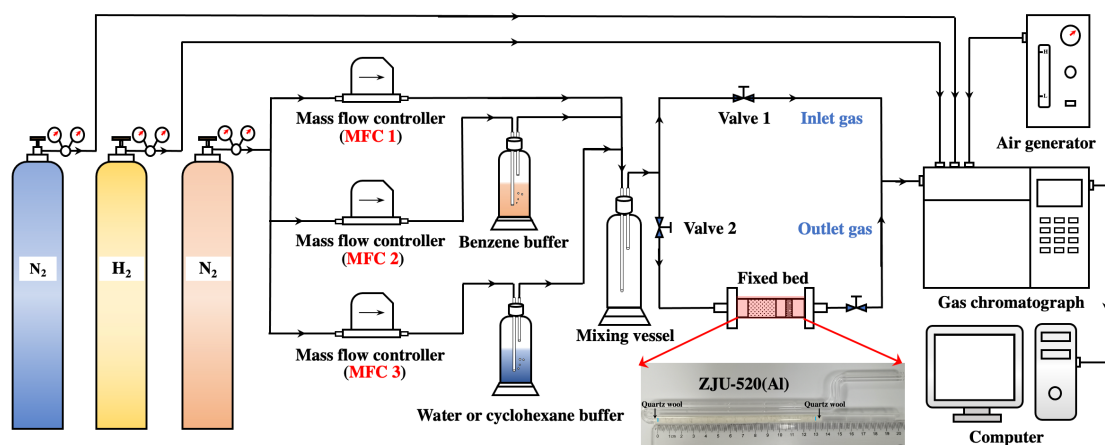

**Supplementary Fig. 16** Schematic illustration of dynamic breakthrough experiments of benzene/cyclohexane.

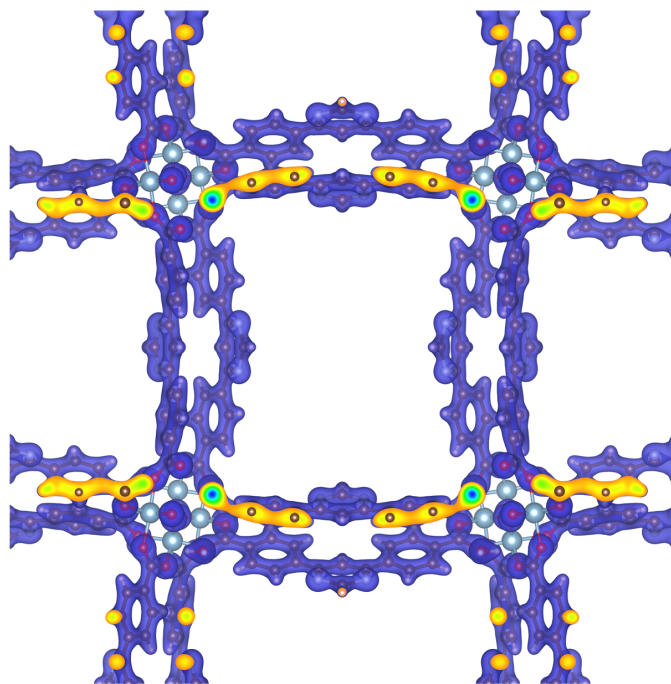

**Supplementary Fig. 17** Density-derived electrostatic and chemical (DDEC) charges of ZJU-520 (Al).

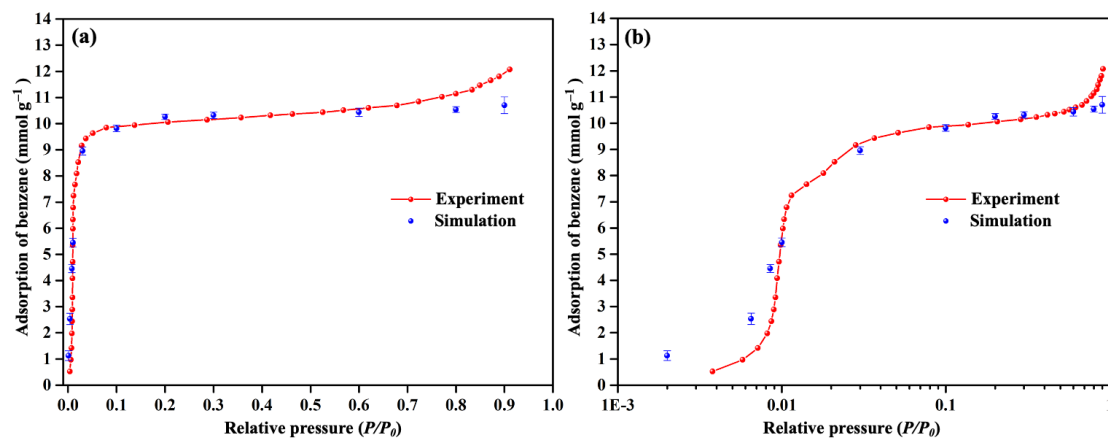

**Supplementary Fig. 18** Experimental benzene adsorption isotherm (in red line) and simulated benzene adsorption (in blue dots) at 298 K by ZJU-520(AI) at normalized scale (a) and logarithmic-scale (b).



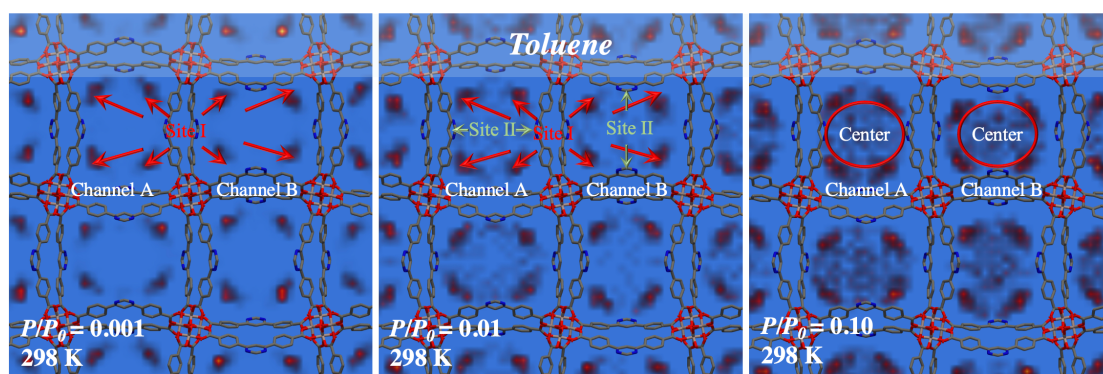

**Supplementary Fig. 19** Adsorption process of toluene by ZJU-520(Al) at 298 K using GCMC simulation, as viewed from c axis.

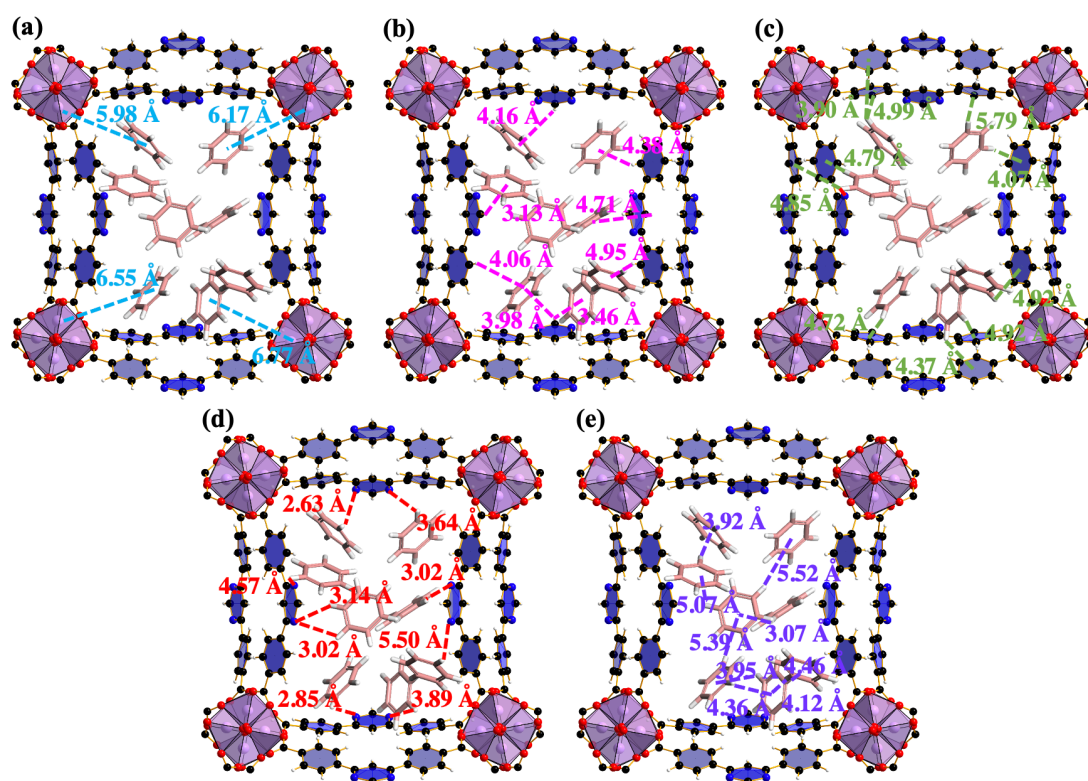

**Supplementary Fig. 20** Host – guest interactions, including Al –  $\pi$  interactions (a) (in blue lines), C – H(L)  $\cdots$   $\pi$ (Bz) interactions (b) (in pink lines), C – H(Bz)  $\cdots$   $\pi$ (L) interactions (c) (in green lines) and C – H(Bz)  $\cdots$  N(L) interactions (d) (in red lines). Guest – guest interactions through C – H(Bz)  $\cdots$   $\pi$ (Bz) interactions (e) (in purple lines) at 298 K and  $P/P_0 = 0.01$ , as viewed from c axis.



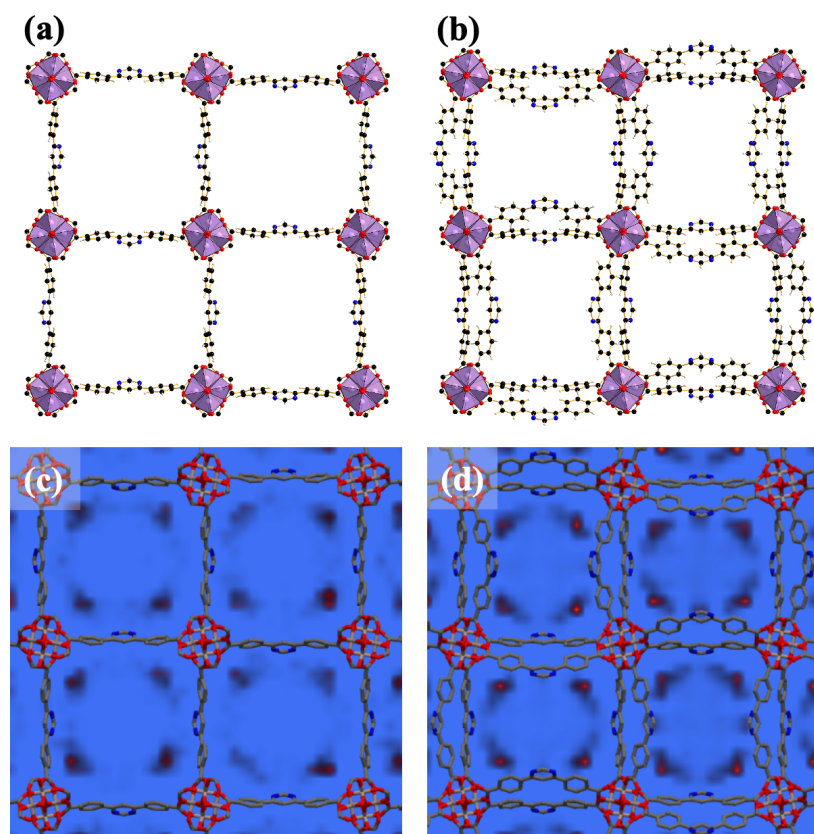

**Supplementary Fig. 21** Structure of single-walled (a) and double-walled (b) ZJU-520(Al), and the potential fields of benzene by single-walled (c) and double-walled (d) ZJU-520(Al) at  $P/P_0 = 0.01$  and 298 K.

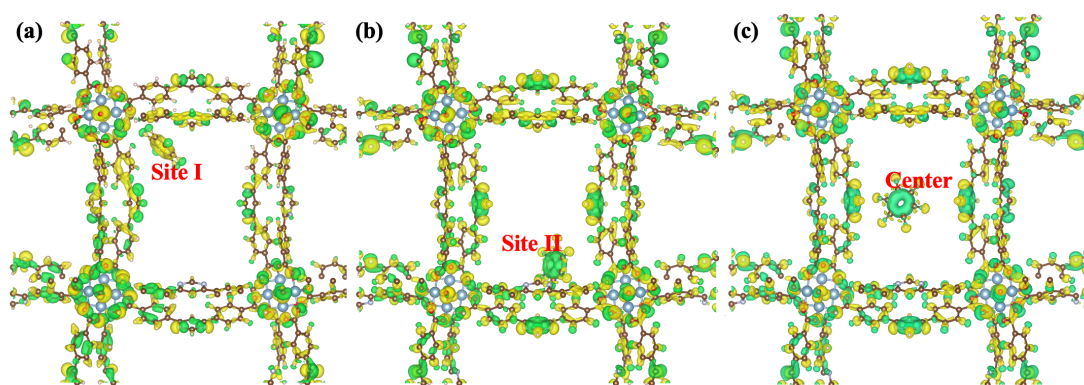

**Supplementary Fig. 22** Isosurfaces of charge density difference in ZJU-520(Al) with benzene molecule in site I (a), site II (b) and center (c). Yellow and green demonstrate electronic accumulation and depletion, respectively, as viewed from c axis.

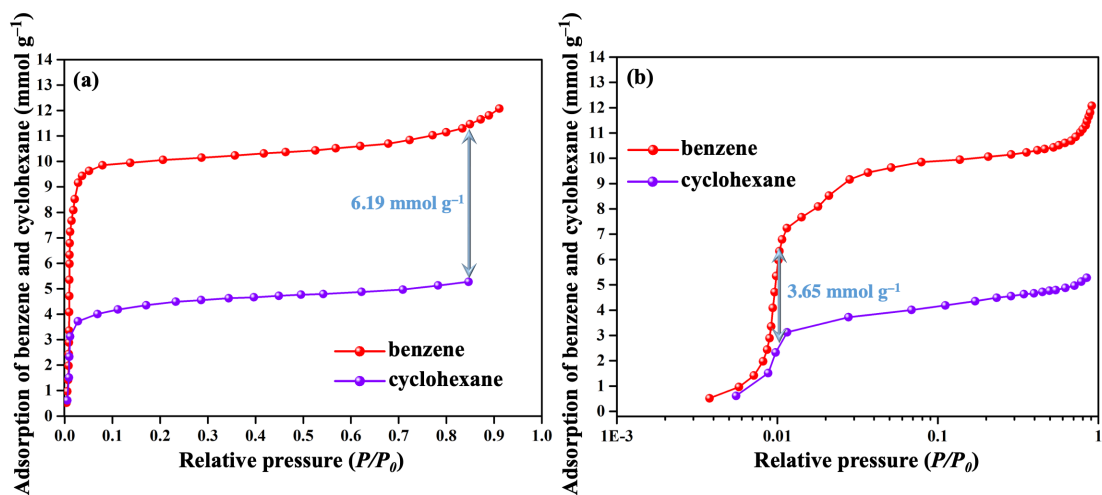

**Supplementary Fig. 23** Benzene and cyclohexane adsorption isotherms by ZJU-520(AI) at normalized scale (a) and logarithmic-scale (b).

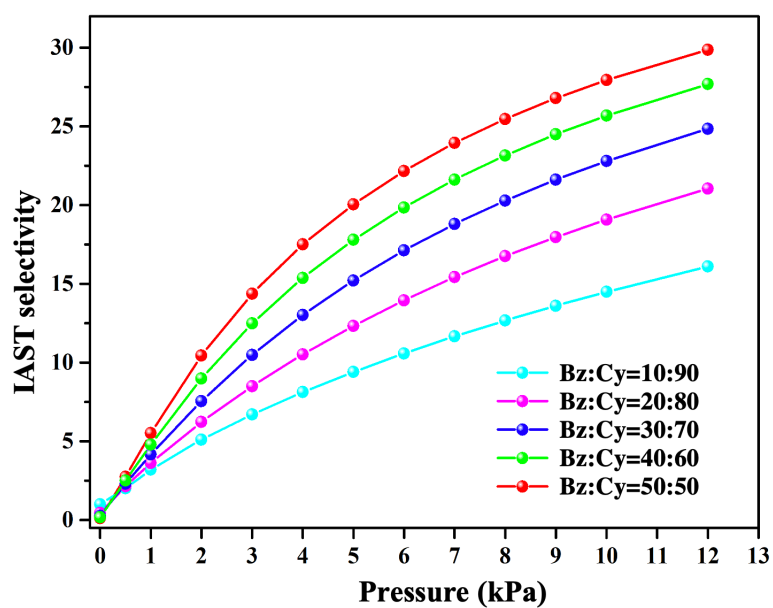

**Supplementary Fig. 24** Predicted ideal adsorption solution theory (IAST) selectivity curves of benzene/cyclohexane (Bz/Cy) with Bz:Cy = 10:90, 20:80, 30:70, 40:60, 50:50, respectively.

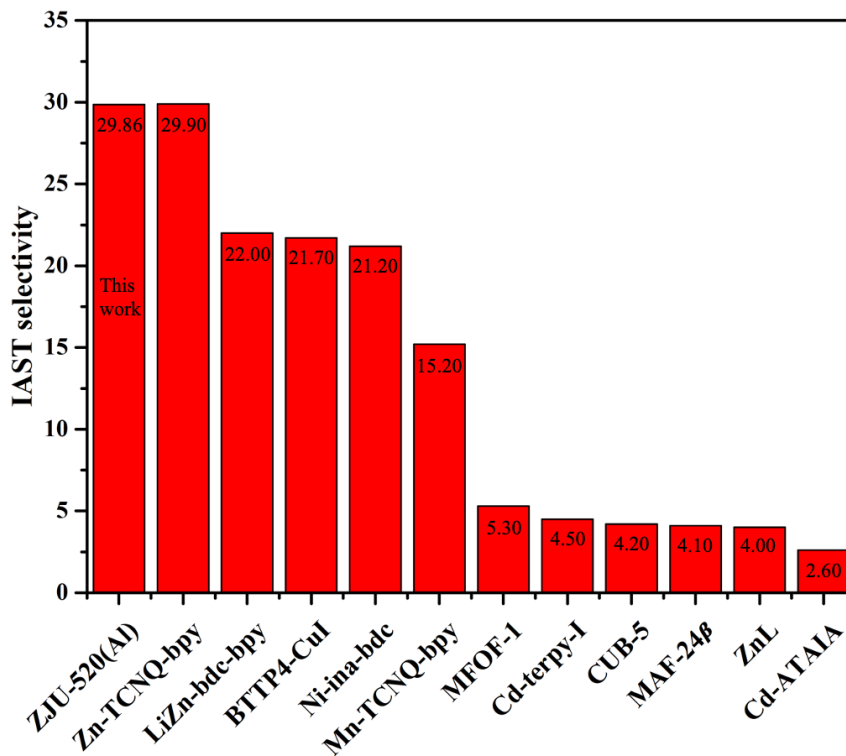

**Supplementary Fig. 25** IAST selectivity of benzene/cyclohexane at vapor volume of 50/50 by ZJU-520(AI) and other reported materials <sup>48</sup>.

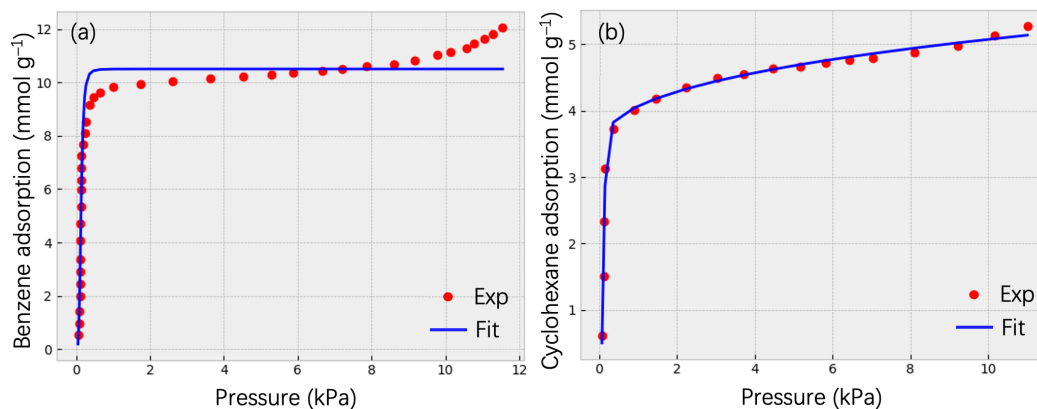

**Supplementary Fig 26.** Isotherms of benzene (a) and cyclohexane (b) by ZJU-520(AI) at 298 K, respectively. The blue solid lines are fitted by DSLF model.

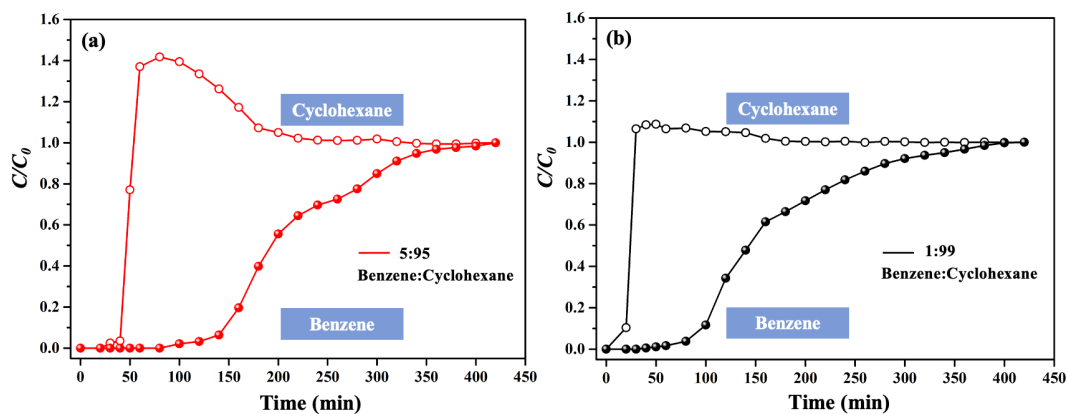

**Supplementary Fig. 27.** Breakthrough curves for benzene/cyclohexane (Bz/Cy) separations, including 5:95 (v/v) (a) and 1:99 (v/v) (b) Bz/Cy mixture separation.

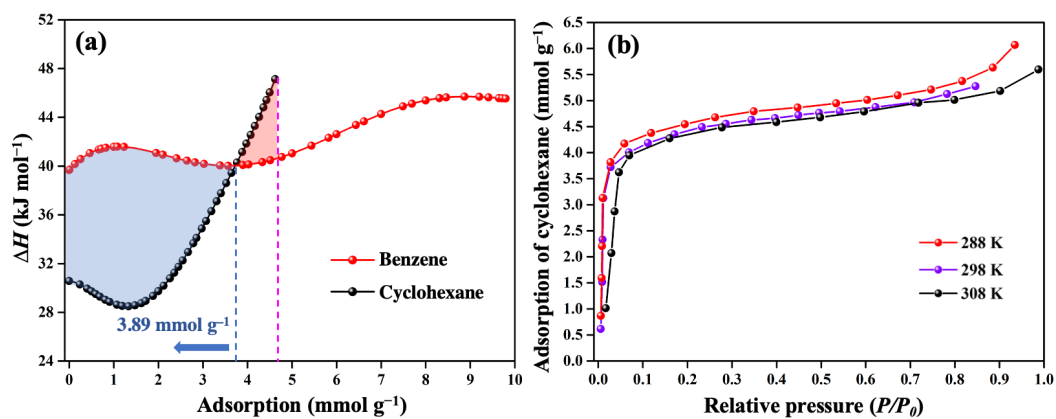

**Supplementary Fig. 28** Isosteric heat ( $\Delta H$ ) of cyclohexane (in black line) and benzene (in red line) (a), and adsorption isotherms of cyclohexane at 288, 298 and 308 K (b) by ZJU-520(AI).

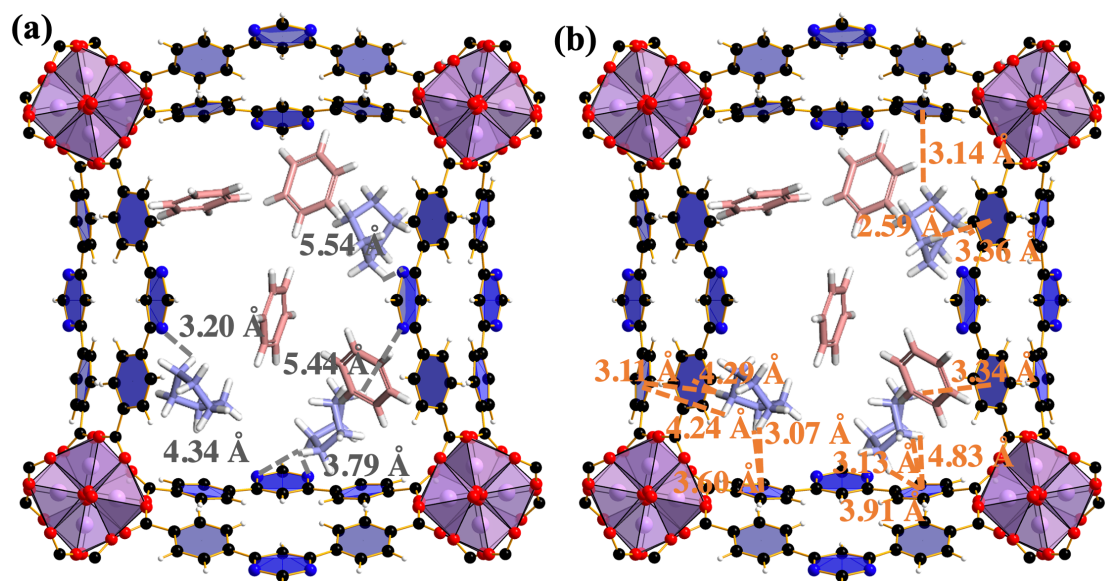

**Supplementary Fig. 29** Interactions between framework and cyclohexane, including C – H(Cy) ... N(L) interactions (a) (in black lines) and C – H(Cy) ... π(L) interactions (b) (in orange lines), as viewed from c axis.

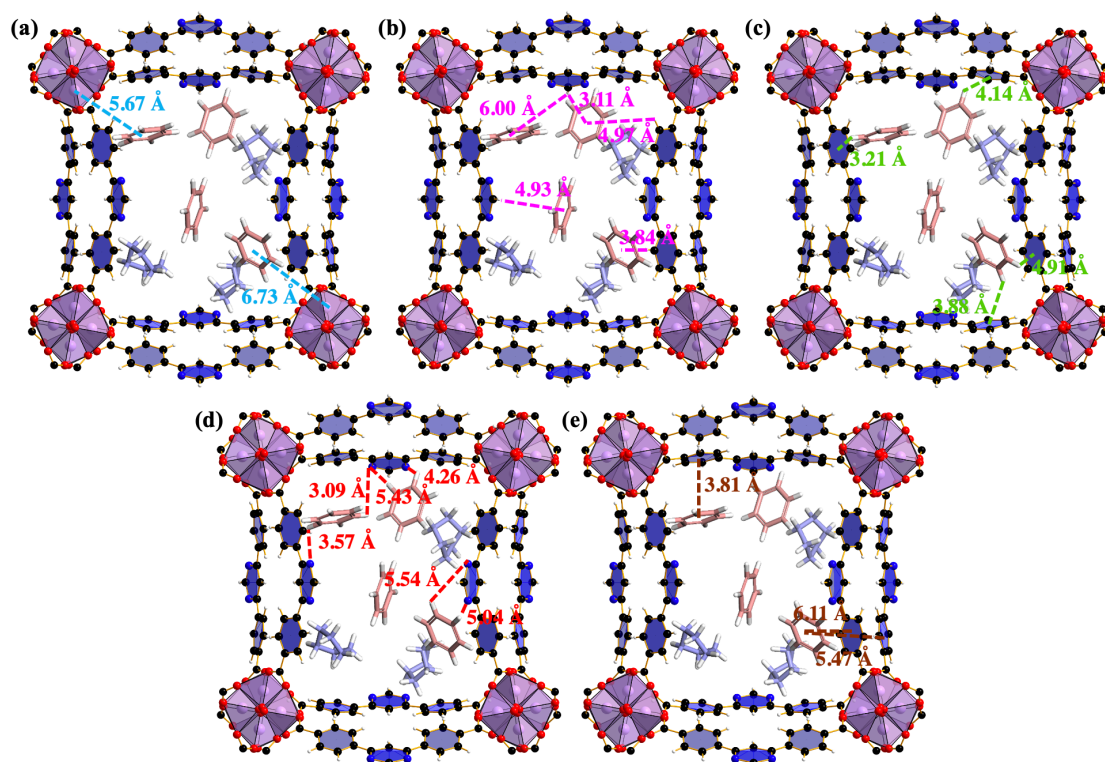

**Supplementary Fig. 30** Interactions between framework and benzene, including Al – π interactions (a) (in blue lines), C – H(L) ... π(Bz) interactions (b) (in pink lines), C – H(Bz) ... π(L) interactions (c) (in green lines), C – H(Bz) ... N(L) (d) (in red lines) and π(Bz) ... π(L) interactions (e) (in brown lines), as viewed from c axis.

**Supplementary Table 1.** Crystal data and structure refinement for ZJU-520(Al) with and without guest molecules.

| Identification code                                          | As-synthesized ZJU-520(Al) with guest molecules                                                     | Activated ZJU-520(Al) without guest molecules                                  |
|--------------------------------------------------------------|-----------------------------------------------------------------------------------------------------|--------------------------------------------------------------------------------|
| Empirical formula                                            | Al(OH)(DBP)·DMF·H <sub>2</sub> O (C <sub>21</sub> H <sub>19</sub> AlN <sub>3</sub> O <sub>7</sub> ) | Al(OH)(DBP) (C <sub>18</sub> H <sub>10</sub> AlN <sub>2</sub> O <sub>5</sub> ) |
| Formula weight                                               | 452.37                                                                                              | 361.37                                                                         |
| Temperature/K                                                | 100.15                                                                                              | 100.15                                                                         |
| Crystal system                                               | tetragonal                                                                                          | tetragonal                                                                     |
| Space group                                                  | <i>I4<sub>1</sub>md</i>                                                                             | <i>I4<sub>1</sub>md</i>                                                        |
| <i>a</i> /Å                                                  | 36.647(5)                                                                                           | 36.647(5)                                                                      |
| <i>b</i> /Å                                                  | 36.647(5)                                                                                           | 36.647(5)                                                                      |
| <i>c</i> /Å                                                  | 10.556(2)                                                                                           | 10.556(2)                                                                      |
| $\alpha$ /°                                                  | 90                                                                                                  | 90                                                                             |
| $\beta$ /°                                                   | 90                                                                                                  | 90                                                                             |
| $\gamma$ /°                                                  | 90                                                                                                  | 90                                                                             |
| Volume/Å <sup>3</sup>                                        | 14177(5)                                                                                            | 14177(5)                                                                       |
| <i>Z</i>                                                     | 16                                                                                                  | 16                                                                             |
| $\rho_{\text{calc}}$ g/cm <sup>3</sup>                       | 0.848                                                                                               | 0.677                                                                          |
| $\mu$ /mm <sup>-1</sup>                                      | 0.764                                                                                               | 0.645                                                                          |
| <i>F</i> (000)                                               | 3760.0                                                                                              | 2960.0                                                                         |
| Crystal size/mm <sup>3</sup>                                 | 0.10 × 0.02 × 0.02                                                                                  | 0.10 × 0.02 × 0.02                                                             |
| Radiation                                                    | CuK $\alpha$ ( $\lambda$ = 1.54178)                                                                 | CuK $\alpha$ ( $\lambda$ = 1.54178)                                            |
| $2\theta$ range for data collection/°                        | 6.822 to 107.72                                                                                     | 6.822 to 107.72                                                                |
| Index ranges                                                 | -33 ≤ <i>h</i> ≤ 38, -38 ≤ <i>k</i> ≤ 36, -11 ≤ <i>l</i> ≤ 9                                        | -33 ≤ <i>h</i> ≤ 38, -38 ≤ <i>k</i> ≤ 36, -11 ≤ <i>l</i> ≤ 9                   |
| Reflections collected                                        | 34555                                                                                               | 34555                                                                          |
| Independent reflections                                      | 4161 [R <sub>int</sub> = 0.2076, R <sub>sigma</sub> = 0.1616]                                       | 4161 [R <sub>int</sub> = 0.2076, R <sub>sigma</sub> = 0.1616]                  |
| Data/restraints/parameters                                   | 4161/13/316                                                                                         | 4161/26/257                                                                    |
| Goodness-of-fit on <i>F</i> <sup>2</sup>                     | 1.006                                                                                               | 0.987                                                                          |
| Final <i>R</i> indexes [ <i>I</i> ≥ 2 $\sigma$ ( <i>I</i> )] | R <sub>1</sub> = 0.0980, wR <sub>2</sub> = 0.2524                                                   | R <sub>1</sub> = 0.0804, wR <sub>2</sub> = 0.2020                              |
| Final <i>R</i> indexes [all data]                            | R <sub>1</sub> = 0.1204, wR <sub>2</sub> = 0.2831                                                   | R <sub>1</sub> = 0.1204, wR <sub>2</sub> = 0.2272                              |
| Largest diff. peak/hole / e Å <sup>-3</sup>                  | 0.47/-0.46                                                                                          | 0.24/-0.38                                                                     |
| Flack parameter                                              | 0.56(18)                                                                                            | 0.36(15)                                                                       |

$$^a R_1 = \sum (|F_o| - |F_c|) / \sum |F_o|;$$

$$^a wR_2 = [ [\sum w(|F_o|^2 - |F_c|^2)^2 / \sum w(F_o^2)^2] ]^{1/2}, [F_o > 4\sigma(F_o)].$$

**Supplementary Table 2.** Selected bond length (Å) of ZJU-520(Al).

| Atom       | Length (Å) | Atom      | Length (Å) | Atom      | Length (Å) |
|------------|------------|-----------|------------|-----------|------------|
| Al01-O002  | 1.828(8)   | C00G-C00M | 1.433(18)  | C1-C00Q   | 1.378(18)  |
| Al01-O0021 | 1.836(9)   | C4-C00U   | 1.384(18)  | C00C-C2   | 1.405(17)  |
| Al01-O003  | 1.877(8)   | C4-C00U3  | 1.384(18)  | C00C-C00K | 1.462(17)  |
| Al01-O004  | 1.901(8)   | C00H-C00I | 1.413(16)  | C2-C00I   | 1.365(16)  |
| Al01-O005  | 1.935(8)   | C00H-C00Q | 1.369(17)  | C00E-C00H | 1.475(16)  |
| Al01-O006  | 1.945(8)   | C00J-C00N | 1.370(18)  | C00G-C5   | 1.451(15)  |
| N1-C00K    | 1.424(17)  | C00K-C00P | 1.384(16)  | C00G-C00J | 1.418(17)  |
| N1-C00O    | 1.331(14)  | C00M-C00T | 1.391(16)  | C00U-N9   | 1.44(3)    |
| O003-C00E  | 1.282(14)  | C00N-C00R | 1.401(19)  | N9-C10    | 1.32(4)    |
| O004-C5    | 1.307(13)  | N9A-C10A  | 1.33(3)    | O009-C00L | 1.26(2)    |
| O005-C51   | 1.209(13)  | N9A-C00U  | 1.50(3)    | N8-C6     | 1.53(3)    |
| O006-C00E2 | 1.266(14)  | C00R-C00T | 1.394(17)  | N8-C7     | 1.49(3)    |
| C1-C00C    | 1.389(19)  | C00R-C00U | 1.500(19)  | N8-C00L   | 1.30(2)    |

**Supplementary Table 3.** Selected bond angle (°) of ZJU-520(Al).

| Atom            | Angle (°) | Atom            | Angle (°) | Atom            | Angle (°) |
|-----------------|-----------|-----------------|-----------|-----------------|-----------|
| O002-Al01-O0021 | 92.8(3)   | C1-C00C-C2      | 117.5(11) | C00T-C00M-C00G  | 119.7(11) |
| O0021-Al01-O003 | 93.4(4)   | C1-C00C-C00K    | 121.0(11) | C00J-C00N-C00R  | 118.0(11) |
| O002-Al01-O003  | 173.8(4)  | C2-C00C-C00K    | 121.2(12) | C10A-N9A-C00U   | 113(3)    |
| O002-Al01-O004  | 89.3(4)   | C00I-C2-C00C    | 121.4(12) | N13-C00O-N1     | 127.1(19) |
| O0021-Al01-O004 | 177.2(4)  | O003-C00E-C00H  | 119.5(10) | N9A3-C10A-N9A   | 130(4)    |
| O002-Al01-O005  | 91.0(4)   | O0061-C00E-O003 | 123.5(10) | C00K3-C00P-C00K | 120.7(17) |
| O0021-Al01-O005 | 91.6(3)   | O0061-C00E-C00H | 117.0(11) | C00H-C00Q-C1    | 120.0(12) |
| O0021-Al01-O006 | 89.2(3)   | C00J-C00G-C5    | 124.5(11) | C00N-C00R-C00U  | 120.4(12) |
| O002-Al01-O006  | 93.6(3)   | C00J-C00G-C00M  | 116.1(10) | C00T-C00R-C00N  | 120.3(11) |
| O003-Al01-O004  | 84.5(3)   | C00M-C00G-C5    | 119.4(10) | C00T-C00R-C00U  | 119.3(12) |
| O003-Al01-O005  | 89.6(3)   | C00U-C4-C00U3   | 119.1(18) | C00M-C00T-C00R  | 121.4(12) |
| O003-Al01-O006  | 85.7(3)   | C00I-C00H-C00E  | 119.2(10) | C4-C00U-N9A     | 117.7(15) |
| O004-Al01-O005  | 90.3(3)   | C00Q-C00H-C00E  | 121.0(11) | C4-C00U-C00R    | 123.1(14) |
| O004-Al01-O006  | 88.7(3)   | C00Q-C00H-C00I  | 119.6(11) | C4-C00U-N9      | 117.8(15) |
| O005-Al01-O006  | 175.2(4)  | O004-C5-C00G    | 113.5(10) | C00R-C00U-N9A   | 112.4(15) |
| C00O-N1-C00K    | 116.9(12) | O0052-C5-O004   | 124.6(9)  | N9-C00U-C00R    | 115.0(14) |
| Al01-O002-Al012 | 127.1(4)  | O0052-C5-C00G   | 121.7(10) | C10-N9-C00U     | 110(3)    |
| C00E-O003-Al01  | 131.3(7)  | C2-C00I-C00H    | 119.5(11) | N93-C10-N9      | 129(7)    |
| C5-O004-Al01    | 130.0(6)  | C00N-C00J-C00G  | 124.4(12) | C7-N8-C6        | 116(2)    |
| C51-O005-Al01   | 134.3(7)  | N1-C00K-C00C    | 116.5(10) | C00L-N8-C6      | 124(2)    |
| C00E2-O006-Al01 | 133.4(7)  | C00P-C00K-N1    | 119.2(12) | C00L-N8-C7      | 118(2)    |
| C00Q-C1-C00C    | 121.7(11) | C00P-C00K-C00C  | 123.8(13) | O009-C00L-N8    | 122.3(16) |

**Supplementary Table 4.** The elemental analysis of ZJU-520(Al).

| Al     | C       | N      | O       | H      |
|--------|---------|--------|---------|--------|
| 9.60 % | 52.12 % | 5.30 % | 26.92 % | 6.06 % |

**Supplementary Table 5.** Benzene adsorption by reported adsorbents at 298 K and  $P/P_0 = 0.01$ .

| <b>Adsorbents</b>                                                             | <b><math>Q_{0.01}</math> (mmol g<sup>-1</sup>)</b> | <b><math>S_{BET}</math> (m<sup>2</sup> g<sup>-1</sup>)</b> | <b>Reference</b> |
|-------------------------------------------------------------------------------|----------------------------------------------------|------------------------------------------------------------|------------------|
| <b>ZJU-520(Al)</b>                                                            | <b>5.98</b>                                        | <b>2235</b>                                                | <b>This work</b> |
| Double-walled BUT-53(Co)                                                      | 2.49                                               | 811                                                        | 38               |
| Double-walled BUT-54(Co)                                                      | 4.31                                               | 1128                                                       | 38               |
| Double-walled BUT-55(Co)                                                      | 3.51                                               | 873                                                        | 38               |
| Double-walled BUT-56(Co)                                                      | 3.42                                               | 897                                                        | 38               |
| Double-walled BUT-57(Co)                                                      | 3.44                                               | 970                                                        | 38               |
| Double-walled BUT-58(Zn)                                                      | 3.41                                               | 849                                                        | 38               |
| ZJU-620(Al)                                                                   | 3.80                                               | 1324                                                       | 19               |
| Mn-MOF-74                                                                     | 6.30                                               | 1500                                                       | 31               |
| [Li <sub>2</sub> Zn <sub>2</sub> (1-H-bdc) <sub>3</sub> (bpy)]                | 2.44                                               | 1052                                                       | 49               |
| [Li <sub>2</sub> Zn <sub>2</sub> (1-NH <sub>2</sub> -bdc) <sub>3</sub> (bpy)] | 2.05                                               | 876                                                        | 49               |
| [Li <sub>2</sub> Zn <sub>2</sub> (1-NO <sub>2</sub> -bdc) <sub>3</sub> (bpy)] | 1.22                                               | 742                                                        | 49               |
| MIL-101(Cr)                                                                   | 1.09                                               | 3980                                                       | 50               |
| Carboxen 1000                                                                 | 2.81                                               | 1200                                                       | 50               |
| ZIF-8(Zn)                                                                     | 0.01                                               | 1345                                                       | 50               |
| MCM-41                                                                        | 0.42                                               | 1046                                                       | 50               |
| PAF-1                                                                         | 3.66                                               | 4201                                                       | 50               |
| BUT-66(Zr)                                                                    | 2.72                                               | 1096                                                       | 50               |
| BUT-67(Zr)                                                                    | 1.95                                               | 984                                                        | 50               |
| MOF-177(Zn)                                                                   | 1.60                                               | 2970                                                       | 51               |
| HKUST-1                                                                       | 0.91                                               | 1707                                                       | 52               |
| SBA-15                                                                        | 0.63                                               | 805                                                        | 53               |
| HZSM-5                                                                        | 1.35                                               | 550                                                        | 53               |
| Active carbon                                                                 | 2.35                                               | 1600                                                       | 53               |
| IISERP-COF2                                                                   | 0.13                                               | 584                                                        | 54               |
| IISERP-COF4                                                                   | 0.063                                              | 337                                                        | 54               |
| UiO-66-(Cu <sup>II</sup> )                                                    | 3.92                                               | 1240                                                       | 55               |
| MFM-300(Sc)                                                                   | 3.02                                               | 1228                                                       | 55               |
| MFM-300(VIII)                                                                 | 2.28                                               | 1461                                                       | 55               |
| MFM-300(Cr)                                                                   | 2.71                                               | 1415                                                       | 55               |
| MFM-300(Fe)                                                                   | 2.63                                               | 1062                                                       | 55               |
| MFM-300(Al)                                                                   | 2.99                                               | 1370                                                       | 55               |
| MFM-300(Ga)                                                                   | 3.01                                               | 1242                                                       | 55               |
| MFM-300(In)                                                                   | 2.82                                               | 1084                                                       | 55               |
| UiO-66-(Cu <sup>I</sup> )                                                     | 2.74                                               | 1201                                                       | 55               |
| UiO-66-defect                                                                 | 2.55                                               | 1313                                                       | 55               |
| UiO-66                                                                        | 1.78                                               | 996                                                        | 55               |



**Supplementary Table 6.** Theoretical interplanar spacing obtained from the crystal information file of ZJU-520(A1).

| $(h, k, l)$ | $2\theta$ | Interplanar spacing (Å) | $(h, k, l)$ | $2\theta$ | Interplanar spacing (Å) |
|-------------|-----------|-------------------------|-------------|-----------|-------------------------|
| (2,2,0)     | 6.82      | 12.96                   | (1,5,0)     | 12.31     | 7.19                    |
| (3,1,0)     | 7.62      | 11.59                   | (1,4,1)     | 13.01     | 6.80                    |
| (1,0,1)     | 8.71      | 10.14                   | (4,1,1)     | 13.01     | 6.80                    |
| (4,0,0)     | 9.65      | 9.16                    | (4,4,0)     | 13.66     | 6.48                    |
| (2,1,1)     | 9.96      | 8.87                    | (3,5,0)     | 14.08     | 6.28                    |
| (1,2,1)     | 9.96      | 8.87                    | (5,3,0)     | 14.08     | 6.28                    |
| (4,2,0)     | 10.79     | 8.19                    | (0,6,0)     | 14.49     | 6.11                    |
| (0,3,1)     | 11.07     | 7.99                    | (3,4,1)     | 14.70     | 6.02                    |
| (3,0,1)     | 11.07     | 7.99                    | (6,2,0)     | 15.28     | 5.79                    |
| (2,3,1)     | 12.08     | 7.32                    | (5,2,1)     | 15.48     | 5.72                    |
| (3,2,1)     | 12.08     | 7.32                    | (6,1,1)     | 16.93     | 5.23                    |
| (5,1,0)     | 12.31     | 7.19                    | (7,1,0)     | 17.10     | 5.18                    |

**Supplementary Table 7.** Restrained electrostatic potential (RESP) charges of H<sub>2</sub>DBP ligand.

| Atom Number | Charge (e) | Atom Number | Charge (e) | Atom Number | Charge (e) |
|-------------|------------|-------------|------------|-------------|------------|
| C1          | 0.468      | C13         | -0.267     | H1          | 0.430      |
| C2          | 0.217      | C14         | 0.215      | H2          | 0.173      |
| C3          | -0.266     | C15         | -0.244     | H3          | 0.188      |
| C4          | -0.045     | C16         | 0.040      | H4          | 0.115      |
| C5          | -0.301     | C17         | -0.303     | H5          | 0.126      |
| C6          | 0.041      | C18         | 0.469      | H6          | 0.251      |
| C7          | -0.255     | O1          | -0.470     | H7          | 0.046      |
| C8          | 0.854      | O2          | -0.545     | H8          | 0.125      |
| C9          | -0.864     | O3          | -0.469     | H9          | 0.173      |
| C10         | 0.839      | O4          | -0.546     | H10         | 0.114      |
| C11         | 0.609      | N1          | -0.748     | H11         | 0.189      |
| C12         | -0.044     | N2          | -0.745     | H12         | 0.430      |

**Supplementary Table 8.** Density-derived electrostatic and chemical (DDEC) charges of ZJU-520(AI).

| Atom | x     | y     | z    | Partial charge | Atom | x     | y     | z     | Partial charge | Atom | x     | y     | z     | Partial charge | Atom | x     | y     | z     | Partial charge |
|------|-------|-------|------|----------------|------|-------|-------|-------|----------------|------|-------|-------|-------|----------------|------|-------|-------|-------|----------------|
| Al1  | 26.11 | 27.63 | 2.94 | 1.59           | C13  | 22.15 | 27.65 | 0.50  | -0.10          | C169 | 32.77 | 10.42 | 10.36 | -0.08          | H37  | 14.44 | 8.72  | 1.41  | 0.12           |
| Al2  | 7.79  | 9.30  | 8.22 | 1.59           | C14  | 20.86 | 30.02 | 6.57  | 0.06           | C170 | 35.45 | 8.84  | 3.14  | 0.23           | H38  | 14.72 | 5.63  | 7.99  | 0.13           |
| Al3  | 28.86 | 27.35 | 8.22 | 1.59           | C15  | 22.01 | 30.46 | 7.23  | -0.12          | C171 | 31.69 | 11.77 | 1.51  | -0.08          | H39  | 7.22  | 8.48  | 0.92  | 0.42           |
| Al4  | 10.53 | 9.02  | 2.94 | 1.59           | C16  | 19.62 | 30.41 | 7.33  | 0.20           | C172 | 34.02 | 10.80 | 0.22  | -0.13          | H40  | 7.14  | 7.58  | 1.96  | 0.42           |
| Al5  | 9.02  | 7.79  | 5.58 | 1.59           | C17  | 2.61  | 9.28  | 5.14  | -0.12          | C173 | 32.82 | 9.32  | 5.78  | -0.10          | H41  | 8.84  | 1.82  | 2.99  | 0.11           |
| Al6  | 27.35 | 26.11 | 0.30 | 1.59           | C18  | 2.51  | 8.96  | 3.79  | 0.05           | C174 | 34.11 | 11.70 | 1.29  | 0.06           | H42  | 9.90  | 3.65  | 10.10 | 0.11           |
| Al7  | 9.30  | 10.53 | 0.30 | 1.59           | C19  | 3.69  | 8.64  | 3.11  | -0.11          | C175 | 32.96 | 12.13 | 1.95  | -0.12          | H43  | 9.90  | 5.69  | 0.62  | 0.11           |
| Al8  | 27.63 | 28.86 | 5.58 | 1.59           | C20  | 6.25  | 8.82  | 5.82  | 0.62           | C176 | 35.45 | 12.15 | 1.79  | 0.20           | H44  | 8.50  | 3.94  | 6.99  | 0.12           |
| Al9  | 26.11 | 9.02  | 2.94 | 1.59           | C21  | 5.09  | 10.86 | 0.41  | -0.03          | C177 | 15.71 | 27.61 | 10.42 | -0.12          | H45  | 6.21  | 5.73  | 9.85  | 0.13           |
| Al10 | 7.79  | 27.35 | 8.22 | 1.59           | C22  | 4.97  | 8.96  | 5.11  | -0.01          | C178 | 15.82 | 27.29 | 9.07  | 0.05           | H46  | 7.85  | 1.85  | 7.71  | 0.11           |
| Al11 | 28.86 | 9.30  | 8.22 | 1.59           | C23  | 6.41  | 10.48 | 10.51 | 0.62           | C179 | 14.63 | 26.97 | 8.38  | -0.11          | H47  | 8.72  | 3.88  | 4.05  | 0.12           |
| Al12 | 10.53 | 27.63 | 2.94 | 1.59           | C24  | 4.90  | 8.64  | 3.74  | -0.08          | C180 | 12.07 | 27.14 | 0.55  | 0.62           | H48  | 5.63  | 3.60  | 0.07  | 0.12           |
| Al13 | 9.02  | 28.86 | 5.58 | 1.59           | C25  | 3.88  | 10.42 | 10.36 | -0.08          | C181 | 13.24 | 29.18 | 5.68  | -0.03          | H49  | 8.48  | 11.11 | 3.56  | 0.42           |
| Al14 | 27.35 | 10.53 | 0.30 | 1.59           | C26  | 1.20  | 8.84  | 3.14  | 0.23           | C182 | 13.35 | 27.28 | 10.39 | -0.01          | H50  | 7.58  | 11.19 | 4.59  | 0.42           |
| Al15 | 9.30  | 26.11 | 0.30 | 1.59           | C27  | 4.96  | 11.77 | 1.51  | -0.08          | C183 | 11.91 | 28.80 | 5.23  | 0.62           | H51  | 27.17 | 20.15 | 8.27  | 0.11           |
| Al16 | 27.63 | 7.79  | 5.58 | 1.59           | C28  | 2.63  | 10.80 | 0.22  | -0.13          | C184 | 13.42 | 26.96 | 9.02  | -0.08          | H52  | 28.23 | 21.97 | 4.82  | 0.11           |
| N1   | 19.52 | 26.60 | 7.11 | -0.34          | C29  | 3.83  | 9.32  | 5.78  | -0.10          | C185 | 14.44 | 28.75 | 5.09  | -0.08          | H53  | 28.23 | 24.02 | 5.90  | 0.11           |
| N2   | 19.64 | 30.98 | 8.72 | -0.33          | C30  | 2.54  | 11.70 | 1.29  | 0.06           | C186 | 17.12 | 27.16 | 8.42  | 0.23           | H54  | 26.82 | 22.26 | 1.71  | 0.12           |
| N3   | 1.19  | 8.28  | 1.84 | -0.34          | C31  | 3.69  | 12.13 | 1.95  | -0.12          | C187 | 13.37 | 30.09 | 6.78  | -0.08          | H55  | 24.53 | 24.05 | 4.57  | 0.13           |
| N4   | 1.21  | 12.46 | 3.26 | -0.33          | C32  | 1.20  | 12.15 | 1.79  | 0.20           | C188 | 15.69 | 29.13 | 5.50  | -0.13          | H56  | 26.18 | 20.17 | 2.43  | 0.11           |
| N5   | 35.46 | 28.37 | 1.84 | -0.34          | C33  | 34.03 | 27.36 | 5.14  | -0.12          | C189 | 14.49 | 27.65 | 0.50  | -0.10          | H57  | 27.05 | 22.20 | 9.33  | 0.12           |
| N6   | 35.44 | 24.19 | 3.26 | -0.33          | C34  | 34.14 | 27.68 | 3.79  | 0.05           | C190 | 15.79 | 30.02 | 6.57  | 0.06           | H58  | 23.95 | 21.93 | 5.35  | 0.13           |
| N7   | 17.13 | 10.05 | 7.11 | -0.34          | C35  | 32.96 | 28.01 | 3.11  | -0.11          | C191 | 14.64 | 30.46 | 7.23  | -0.12          | H59  | 26.80 | 29.43 | 8.84  | 0.42           |

|     |       |       |      |       |     |       |       |       |       |      |       |       |      |       |     |       |       |       |      |
|-----|-------|-------|------|-------|-----|-------|-------|-------|-------|------|-------|-------|------|-------|-----|-------|-------|-------|------|
| N8  | 17.01 | 5.67  | 8.72 | -0.33 | C36 | 30.40 | 27.83 | 5.82  | 0.62  | C192 | 17.03 | 30.40 | 7.33 | 0.20  | H60 | 25.90 | 29.51 | 9.87  | 0.42 |
| N9  | 10.05 | 1.19  | 9.75 | -0.34 | C37 | 31.56 | 25.79 | 0.41  | -0.03 | C193 | 9.04  | 34.03 | 2.50 | -0.12 | H61 | 9.48  | 16.50 | 8.27  | 0.11 |
| N10 | 5.87  | 1.21  | 0.62 | -0.33 | C38 | 31.68 | 27.69 | 5.11  | -0.01 | C194 | 9.36  | 34.14 | 1.15 | 0.05  | H62 | 8.42  | 14.67 | 4.82  | 0.11 |
| N11 | 28.37 | 19.52 | 4.48 | -0.34 | C39 | 30.23 | 26.17 | 10.51 | 0.62  | C195 | 9.68  | 32.96 | 0.47 | -0.11 | H63 | 8.42  | 12.63 | 5.90  | 0.11 |
| N12 | 23.99 | 19.64 | 6.09 | -0.33 | C40 | 31.75 | 28.01 | 3.74  | -0.08 | C196 | 9.51  | 30.40 | 3.18 | 0.62  | H64 | 9.83  | 14.38 | 1.71  | 0.12 |
| N13 | 8.28  | 17.13 | 4.48 | -0.34 | C41 | 32.77 | 26.23 | 10.36 | -0.08 | C197 | 7.47  | 31.56 | 8.32 | -0.03 | H65 | 12.12 | 12.60 | 4.57  | 0.13 |
| N14 | 12.65 | 17.02 | 6.07 | -0.33 | C42 | 35.45 | 27.81 | 3.14  | 0.23  | C198 | 9.37  | 31.68 | 2.47 | -0.01 | H66 | 10.47 | 16.47 | 2.43  | 0.11 |
| N15 | 26.60 | 35.46 | 9.75 | -0.34 | C43 | 31.69 | 24.88 | 1.51  | -0.08 | C199 | 7.85  | 30.23 | 7.87 | 0.62  | H67 | 9.60  | 14.44 | 9.33  | 0.12 |
| N16 | 30.78 | 35.44 | 0.62 | -0.33 | C44 | 34.02 | 25.84 | 0.22  | -0.13 | C200 | 9.69  | 31.75 | 1.10 | -0.08 | H68 | 12.69 | 14.72 | 5.35  | 0.13 |
| N17 | 19.52 | 10.05 | 7.11 | -0.34 | C45 | 32.82 | 27.32 | 5.78  | -0.10 | C201 | 7.90  | 32.77 | 7.72 | -0.08 | H69 | 9.84  | 7.22  | 8.84  | 0.42 |
| N18 | 19.63 | 5.67  | 8.72 | -0.33 | C46 | 34.11 | 24.95 | 1.29  | 0.06  | C202 | 9.48  | 35.45 | 0.51 | 0.23  | H70 | 10.75 | 7.14  | 9.87  | 0.42 |
| N19 | 1.19  | 28.37 | 1.84 | -0.34 | C47 | 32.96 | 24.51 | 1.95  | -0.12 | C203 | 6.56  | 31.69 | 9.42 | -0.08 | H71 | 27.81 | 34.82 | 2.99  | 0.11 |
| N20 | 1.21  | 24.19 | 3.26 | -0.33 | C48 | 35.45 | 24.50 | 1.79  | 0.20  | C204 | 7.52  | 34.02 | 8.14 | -0.13 | H72 | 26.75 | 33.00 | 10.10 | 0.11 |
| N21 | 35.46 | 8.28  | 1.84 | -0.34 | C49 | 15.71 | 9.04  | 10.42 | -0.12 | C205 | 9.00  | 32.82 | 3.14 | -0.10 | H73 | 26.74 | 30.96 | 0.62  | 0.11 |
| N22 | 35.44 | 12.46 | 3.26 | -0.33 | C50 | 15.82 | 9.36  | 9.07  | 0.05  | C206 | 6.63  | 34.11 | 9.21 | 0.06  | H74 | 28.15 | 32.71 | 6.99  | 0.12 |
| N23 | 17.13 | 26.60 | 7.11 | -0.34 | C51 | 14.63 | 9.68  | 8.38  | -0.11 | C207 | 6.19  | 32.96 | 9.87 | -0.12 | H75 | 30.44 | 30.92 | 9.85  | 0.13 |
| N24 | 17.01 | 30.98 | 8.72 | -0.33 | C52 | 12.07 | 9.51  | 0.55  | 0.62  | C208 | 6.18  | 35.45 | 9.71 | 0.20  | H76 | 28.80 | 34.80 | 7.71  | 0.11 |
| N25 | 10.05 | 35.46 | 9.75 | -0.34 | C53 | 13.24 | 7.47  | 5.68  | -0.03 | C209 | 27.36 | 15.71 | 7.78 | -0.12 | H77 | 27.92 | 32.77 | 4.05  | 0.12 |
| N26 | 5.87  | 35.44 | 0.62 | -0.33 | C54 | 13.35 | 9.37  | 10.39 | -0.01 | C210 | 27.68 | 15.82 | 6.43 | 0.05  | H78 | 31.02 | 33.04 | 0.07  | 0.12 |
| N27 | 28.37 | 17.13 | 4.48 | -0.34 | C55 | 11.91 | 7.85  | 5.23  | 0.62  | C211 | 28.01 | 14.63 | 5.75 | -0.11 | H79 | 28.17 | 25.54 | 3.56  | 0.42 |
| N28 | 23.99 | 17.01 | 6.09 | -0.33 | C56 | 13.42 | 9.69  | 9.02  | -0.08 | C212 | 27.83 | 12.07 | 8.46 | 0.62  | H80 | 29.07 | 25.46 | 4.59  | 0.42 |
| N29 | 8.28  | 19.52 | 4.48 | -0.34 | C57 | 14.44 | 7.90  | 5.09  | -0.08 | C213 | 25.79 | 13.24 | 3.05 | -0.03 | H81 | 20.15 | 8.84  | 0.35  | 0.11 |
| N30 | 12.65 | 19.63 | 6.07 | -0.33 | C58 | 17.12 | 9.48  | 8.42  | 0.23  | C214 | 27.69 | 13.35 | 7.75 | -0.01 | H82 | 21.97 | 9.90  | 7.46  | 0.11 |
| N31 | 26.60 | 1.19  | 9.75 | -0.34 | C59 | 13.37 | 6.56  | 6.78  | -0.08 | C215 | 26.17 | 11.91 | 2.59 | 0.62  | H83 | 24.02 | 9.90  | 8.54  | 0.11 |
| N32 | 30.78 | 1.21  | 0.62 | -0.33 | C60 | 15.69 | 7.52  | 5.50  | -0.13 | C216 | 28.01 | 13.42 | 6.38 | -0.08 | H84 | 22.26 | 8.50  | 4.35  | 0.12 |

|     |       |       |      |       |     |       |       |      |       |      |       |       |      |       |      |       |       |       |      |
|-----|-------|-------|------|-------|-----|-------|-------|------|-------|------|-------|-------|------|-------|------|-------|-------|-------|------|
| O1  | 27.30 | 27.55 | 4.33 | -0.77 | C61 | 14.49 | 9.00  | 0.50 | -0.10 | C217 | 26.23 | 14.44 | 2.45 | -0.08 | H85  | 24.05 | 6.21  | 7.21  | 0.13 |
| O2  | 24.76 | 27.76 | 1.65 | -0.58 | C62 | 15.79 | 6.63  | 6.57 | 0.06  | C218 | 27.81 | 17.12 | 5.78 | 0.23  | H86  | 20.17 | 7.85  | 5.07  | 0.11 |
| O3  | 24.73 | 28.03 | 4.18 | -0.58 | C63 | 14.64 | 6.19  | 7.23 | -0.12 | C219 | 24.88 | 13.37 | 4.15 | -0.08 | H87  | 22.20 | 8.72  | 1.41  | 0.12 |
| O4  | 25.74 | 25.74 | 3.12 | -0.52 | C64 | 17.03 | 6.23  | 7.32 | 0.19  | C220 | 25.84 | 15.69 | 2.86 | -0.13 | H88  | 21.93 | 5.63  | 7.99  | 0.13 |
| O5  | 26.37 | 29.53 | 2.67 | -0.56 | C65 | 9.04  | 2.61  | 2.50 | -0.12 | C221 | 27.32 | 14.49 | 8.42 | -0.10 | H89  | 29.43 | 8.48  | 0.92  | 0.42 |
| O6  | 29.43 | 29.02 | 1.09 | -0.78 | C66 | 9.36  | 2.51  | 1.15 | 0.05  | C222 | 24.95 | 15.79 | 3.93 | 0.06  | H90  | 29.51 | 7.58  | 1.96  | 0.42 |
| O7  | 8.98  | 9.23  | 9.61 | -0.77 | C67 | 9.68  | 3.69  | 0.47 | -0.11 | C223 | 24.51 | 14.64 | 4.59 | -0.12 | H91  | 1.82  | 27.17 | 5.63  | 0.11 |
| O8  | 6.43  | 9.44  | 6.93 | -0.58 | C68 | 9.51  | 6.25  | 3.18 | 0.62  | C224 | 24.57 | 17.03 | 4.69 | 0.20  | H92  | 3.65  | 28.23 | 2.18  | 0.11 |
| O9  | 6.40  | 9.70  | 9.46 | -0.58 | C69 | 7.47  | 5.09  | 8.32 | -0.03 | C225 | 9.28  | 20.94 | 7.78 | -0.12 | H93  | 5.69  | 28.23 | 3.26  | 0.11 |
| O10 | 7.41  | 7.41  | 8.40 | -0.52 | C70 | 9.37  | 4.97  | 2.47 | -0.01 | C226 | 8.96  | 20.83 | 6.43 | 0.05  | H94  | 3.94  | 26.82 | 9.63  | 0.12 |
| O11 | 8.04  | 11.21 | 7.95 | -0.56 | C71 | 7.85  | 6.41  | 7.87 | 0.62  | C227 | 8.64  | 22.01 | 5.75 | -0.11 | H95  | 5.73  | 24.53 | 1.93  | 0.13 |
| O12 | 11.11 | 10.70 | 6.37 | -0.78 | C72 | 9.69  | 4.90  | 1.10 | -0.08 | C228 | 8.82  | 24.58 | 8.46 | 0.62  | H96  | 1.85  | 26.18 | 10.34 | 0.11 |
| O13 | 27.67 | 27.42 | 9.61 | -0.77 | C73 | 7.90  | 3.88  | 7.72 | -0.08 | C229 | 10.86 | 23.41 | 3.05 | -0.03 | H97  | 3.88  | 27.05 | 6.69  | 0.12 |
| O14 | 30.21 | 27.21 | 6.93 | -0.58 | C74 | 9.48  | 1.20  | 0.51 | 0.23  | C230 | 8.96  | 23.29 | 7.75 | -0.01 | H98  | 3.60  | 23.95 | 2.71  | 0.12 |
| O15 | 30.24 | 26.94 | 9.46 | -0.58 | C75 | 6.56  | 4.96  | 9.42 | -0.08 | C231 | 10.48 | 24.74 | 2.59 | 0.62  | H99  | 11.11 | 26.80 | 6.20  | 0.42 |
| O16 | 29.23 | 29.24 | 8.40 | -0.52 | C76 | 7.52  | 2.63  | 8.14 | -0.13 | C232 | 8.64  | 23.22 | 6.38 | -0.08 | H100 | 11.19 | 25.90 | 7.23  | 0.42 |
| O17 | 28.61 | 25.44 | 7.95 | -0.56 | C77 | 9.00  | 3.83  | 3.14 | -0.10 | C233 | 10.42 | 22.20 | 2.45 | -0.08 | H101 | 34.82 | 9.48  | 5.63  | 0.11 |
| O18 | 25.54 | 25.95 | 6.37 | -0.78 | C78 | 6.63  | 2.54  | 9.21 | 0.06  | C234 | 8.84  | 19.53 | 5.78 | 0.23  | H102 | 33.00 | 8.42  | 2.18  | 0.11 |
| O19 | 9.35  | 9.10  | 4.33 | -0.77 | C79 | 6.19  | 3.69  | 9.87 | -0.12 | C235 | 11.77 | 23.28 | 4.15 | -0.08 | H103 | 30.96 | 8.42  | 3.26  | 0.11 |
| O20 | 11.89 | 8.89  | 1.65 | -0.58 | C80 | 6.18  | 1.20  | 9.71 | 0.20  | C236 | 10.80 | 20.96 | 2.86 | -0.13 | H104 | 32.71 | 9.83  | 9.63  | 0.12 |
| O21 | 11.92 | 8.62  | 4.18 | -0.58 | C81 | 27.36 | 20.94 | 7.78 | -0.12 | C237 | 9.32  | 22.15 | 8.42 | -0.10 | H105 | 30.92 | 12.12 | 1.93  | 0.13 |
| O22 | 10.91 | 10.91 | 3.12 | -0.52 | C82 | 27.68 | 20.83 | 6.43 | 0.05  | C238 | 11.70 | 20.86 | 3.93 | 0.06  | H106 | 34.80 | 10.47 | 10.34 | 0.11 |
| O23 | 10.28 | 7.11  | 2.67 | -0.56 | C83 | 28.01 | 22.01 | 5.75 | -0.11 | C239 | 12.13 | 22.01 | 4.59 | -0.12 | H107 | 32.77 | 9.60  | 6.69  | 0.12 |
| O24 | 7.22  | 7.63  | 1.09 | -0.78 | C84 | 27.83 | 24.58 | 8.46 | 0.62  | C240 | 12.11 | 19.61 | 4.66 | 0.20  | H108 | 33.04 | 12.69 | 2.71  | 0.12 |
| O25 | 9.10  | 8.98  | 6.97 | -0.77 | C85 | 25.79 | 23.41 | 3.05 | -0.03 | C241 | 27.61 | 2.61  | 2.50 | -0.12 | H109 | 25.54 | 9.84  | 6.20  | 0.42 |

|     |       |       |      |       |      |       |       |      |       |      |       |       |      |       |      |       |       |       |      |
|-----|-------|-------|------|-------|------|-------|-------|------|-------|------|-------|-------|------|-------|------|-------|-------|-------|------|
| O26 | 8.89  | 6.43  | 4.29 | -0.58 | C86  | 27.69 | 23.29 | 7.75 | -0.01 | C242 | 27.29 | 2.51  | 1.15 | 0.05  | H110 | 25.46 | 10.75 | 7.23  | 0.42 |
| O27 | 8.62  | 6.40  | 6.82 | -0.58 | C87  | 26.17 | 24.74 | 2.59 | 0.62  | C243 | 26.97 | 3.69  | 0.47 | -0.11 | H111 | 16.50 | 27.81 | 0.35  | 0.11 |
| O28 | 10.91 | 7.41  | 5.76 | -0.52 | C88  | 28.01 | 23.22 | 6.38 | -0.08 | C244 | 27.14 | 6.25  | 3.18 | 0.62  | H112 | 14.67 | 26.75 | 7.46  | 0.11 |
| O29 | 7.11  | 8.04  | 5.31 | -0.56 | C89  | 26.23 | 22.20 | 2.45 | -0.08 | C245 | 29.18 | 5.09  | 8.32 | -0.03 | H113 | 12.63 | 26.74 | 8.54  | 0.11 |
| O30 | 7.63  | 11.11 | 3.73 | -0.78 | C90  | 27.81 | 19.53 | 5.78 | 0.23  | C246 | 27.28 | 4.97  | 2.47 | -0.01 | H114 | 14.38 | 28.15 | 4.35  | 0.12 |
| O31 | 27.42 | 27.30 | 1.69 | -0.77 | C91  | 24.88 | 23.28 | 4.15 | -0.08 | C247 | 28.80 | 6.41  | 7.87 | 0.62  | H115 | 12.60 | 30.44 | 7.21  | 0.13 |
| O32 | 27.21 | 24.76 | 9.57 | -0.58 | C92  | 25.84 | 20.96 | 2.86 | -0.13 | C248 | 26.96 | 4.90  | 1.10 | -0.08 | H116 | 16.47 | 28.80 | 5.07  | 0.11 |
| O33 | 26.94 | 24.73 | 1.54 | -0.58 | C93  | 27.32 | 22.15 | 8.42 | -0.10 | C249 | 28.75 | 3.88  | 7.72 | -0.08 | H117 | 14.44 | 27.92 | 1.41  | 0.12 |
| O34 | 29.24 | 25.74 | 0.48 | -0.52 | C94  | 24.95 | 20.86 | 3.93 | 0.06  | C250 | 27.16 | 1.20  | 0.51 | 0.23  | H118 | 14.72 | 31.02 | 7.99  | 0.13 |
| O35 | 25.44 | 26.37 | 0.03 | -0.56 | C95  | 24.51 | 22.01 | 4.59 | -0.12 | C251 | 30.09 | 4.96  | 9.42 | -0.08 | H119 | 7.22  | 28.17 | 0.92  | 0.42 |
| O36 | 25.95 | 29.43 | 9.01 | -0.78 | C96  | 24.57 | 19.62 | 4.69 | 0.20  | C252 | 29.13 | 2.63  | 8.14 | -0.13 | H120 | 7.14  | 29.07 | 1.96  | 0.42 |
| O37 | 9.23  | 9.35  | 1.69 | -0.77 | C97  | 9.28  | 15.71 | 7.78 | -0.12 | C253 | 27.65 | 3.83  | 3.14 | -0.10 | H121 | 8.84  | 34.82 | 2.99  | 0.11 |
| O38 | 9.44  | 11.89 | 9.57 | -0.58 | C98  | 8.96  | 15.82 | 6.43 | 0.05  | C254 | 30.02 | 2.54  | 9.21 | 0.06  | H122 | 9.90  | 33.00 | 10.10 | 0.11 |
| O39 | 9.70  | 11.92 | 1.54 | -0.58 | C99  | 8.64  | 14.63 | 5.75 | -0.11 | C255 | 30.46 | 3.69  | 9.87 | -0.12 | H123 | 9.90  | 30.96 | 0.62  | 0.11 |
| O40 | 7.41  | 10.91 | 0.48 | -0.52 | C100 | 8.82  | 12.07 | 8.46 | 0.62  | C256 | 30.47 | 1.20  | 9.71 | 0.20  | H124 | 8.50  | 32.71 | 6.99  | 0.12 |
| O41 | 11.21 | 10.28 | 0.03 | -0.56 | C101 | 10.86 | 13.24 | 3.05 | -0.03 | C257 | 18.32 | 30.15 | 6.61 | -0.25 | H125 | 6.21  | 30.92 | 9.85  | 0.13 |
| O42 | 10.70 | 7.22  | 9.01 | -0.78 | C102 | 8.96  | 13.35 | 7.75 | -0.01 | C258 | 18.32 | 26.36 | 6.57 | 0.22  | H126 | 7.85  | 34.80 | 7.71  | 0.11 |
| O43 | 27.55 | 27.67 | 6.97 | -0.77 | C103 | 10.48 | 11.91 | 2.59 | 0.62  | C259 | 18.32 | 31.27 | 9.42 | 0.15  | H127 | 8.72  | 32.77 | 4.05  | 0.12 |
| O44 | 27.76 | 30.21 | 4.29 | -0.58 | C104 | 8.64  | 13.42 | 6.38 | -0.08 | C260 | 18.32 | 27.41 | 9.06 | -0.27 | H128 | 5.63  | 33.04 | 0.07  | 0.12 |
| O45 | 28.03 | 30.24 | 6.82 | -0.58 | C105 | 10.42 | 14.44 | 2.45 | -0.08 | C261 | 0.00  | 24.93 | 1.24 | -0.25 | H129 | 8.48  | 25.54 | 3.56  | 0.42 |
| O46 | 25.74 | 29.23 | 5.76 | -0.52 | C106 | 8.84  | 17.12 | 5.78 | 0.23  | C262 | 0.00  | 28.61 | 1.30 | 0.21  | H130 | 7.58  | 25.46 | 4.59  | 0.42 |
| O47 | 29.53 | 28.61 | 5.31 | -0.56 | C107 | 11.77 | 13.37 | 4.15 | -0.08 | C263 | 0.00  | 23.87 | 3.73 | 0.21  | H131 | 27.17 | 16.50 | 8.27  | 0.11 |
| O48 | 29.02 | 25.54 | 3.73 | -0.78 | C108 | 10.80 | 15.69 | 2.86 | -0.13 | C264 | 0.00  | 27.57 | 3.78 | -0.26 | H132 | 28.23 | 14.67 | 4.82  | 0.11 |
| O49 | 27.30 | 9.10  | 4.33 | -0.77 | C109 | 9.32  | 14.49 | 8.42 | -0.10 | C265 | 6.60  | 0.00  | 9.15 | -0.25 | H133 | 28.23 | 12.63 | 5.90  | 0.11 |
| O50 | 24.76 | 8.89  | 1.65 | -0.58 | C110 | 11.70 | 15.79 | 3.93 | 0.06  | C266 | 10.29 | 0.00  | 9.21 | 0.21  | H134 | 26.82 | 14.38 | 1.71  | 0.12 |

|     |       |       |      |       |      |       |       |       |       |      |       |       |      |       |      |       |       |       |      |
|-----|-------|-------|------|-------|------|-------|-------|-------|-------|------|-------|-------|------|-------|------|-------|-------|-------|------|
| O51 | 24.73 | 8.62  | 4.18 | -0.58 | C111 | 12.13 | 14.64 | 4.59  | -0.12 | C267 | 5.55  | 0.00  | 1.09 | 0.21  | H135 | 24.53 | 12.60 | 4.57  | 0.13 |
| O52 | 25.74 | 10.91 | 3.12 | -0.52 | C112 | 12.11 | 17.04 | 4.66  | 0.20  | C268 | 9.24  | 0.00  | 1.15 | -0.26 | H136 | 26.18 | 16.47 | 2.43  | 0.11 |
| O53 | 26.37 | 7.11  | 2.67 | -0.56 | C113 | 27.61 | 34.03 | 2.50  | -0.12 | C269 | 24.82 | 18.32 | 3.97 | -0.25 | H137 | 27.05 | 14.44 | 9.33  | 0.12 |
| O54 | 29.43 | 7.63  | 1.09 | -0.78 | C114 | 27.29 | 34.14 | 1.15  | 0.05  | C270 | 28.61 | 18.32 | 3.94 | 0.22  | H138 | 23.95 | 14.72 | 5.35  | 0.13 |
| O55 | 8.98  | 27.42 | 9.61 | -0.77 | C115 | 26.97 | 32.96 | 0.47  | -0.11 | C271 | 23.70 | 18.32 | 6.78 | 0.15  | H139 | 26.80 | 7.22  | 8.84  | 0.42 |
| O56 | 6.43  | 27.21 | 6.93 | -0.58 | C116 | 27.14 | 30.40 | 3.18  | 0.62  | C272 | 27.57 | 18.32 | 6.42 | -0.27 | H140 | 25.90 | 7.14  | 9.87  | 0.42 |
| O57 | 6.40  | 26.94 | 9.46 | -0.58 | C117 | 29.18 | 31.56 | 8.32  | -0.03 | C273 | 11.91 | 18.32 | 3.92 | -0.25 | H141 | 9.48  | 20.15 | 8.27  | 0.11 |
| O58 | 7.41  | 29.24 | 8.40 | -0.52 | C118 | 27.28 | 31.68 | 2.47  | -0.01 | C274 | 8.03  | 18.32 | 3.94 | 0.22  | H142 | 8.42  | 21.97 | 4.82  | 0.11 |
| O59 | 8.04  | 25.44 | 7.95 | -0.56 | C119 | 28.80 | 30.23 | 7.87  | 0.62  | C275 | 12.93 | 18.33 | 6.77 | 0.15  | H143 | 8.42  | 24.02 | 5.90  | 0.11 |
| O60 | 11.11 | 25.95 | 6.37 | -0.78 | C120 | 26.96 | 31.75 | 1.10  | -0.08 | C276 | 9.08  | 18.32 | 6.42 | -0.27 | H144 | 9.83  | 22.26 | 1.71  | 0.12 |
| O61 | 27.67 | 9.23  | 9.61 | -0.77 | C121 | 28.75 | 32.77 | 7.72  | -0.08 | C277 | 30.04 | 0.00  | 9.15 | -0.25 | H145 | 12.12 | 24.05 | 4.57  | 0.13 |
| O62 | 30.21 | 9.44  | 6.93 | -0.58 | C122 | 27.16 | 35.45 | 0.51  | 0.23  | C278 | 26.36 | 0.00  | 9.21 | 0.21  | H146 | 10.47 | 20.17 | 2.43  | 0.11 |
| O63 | 30.24 | 9.70  | 9.46 | -0.58 | C123 | 30.09 | 31.69 | 9.42  | -0.08 | C279 | 31.10 | 0.00  | 1.09 | 0.21  | H147 | 9.60  | 22.20 | 9.33  | 0.12 |
| O64 | 29.23 | 7.41  | 8.40 | -0.52 | C124 | 29.13 | 34.02 | 8.14  | -0.13 | C280 | 27.41 | 0.00  | 1.15 | -0.26 | H148 | 12.69 | 21.93 | 5.35  | 0.12 |
| O65 | 28.61 | 11.21 | 7.95 | -0.56 | C125 | 27.65 | 32.82 | 3.14  | -0.10 | C281 | 18.32 | 6.47  | 6.59 | -0.25 | H149 | 9.84  | 29.43 | 8.84  | 0.42 |
| O66 | 25.54 | 10.70 | 6.37 | -0.78 | C126 | 30.02 | 34.11 | 9.21  | 0.06  | C282 | 18.32 | 10.29 | 6.57 | 0.22  | H150 | 10.75 | 29.51 | 9.87  | 0.42 |
| O67 | 9.35  | 27.55 | 4.33 | -0.77 | C127 | 30.46 | 32.96 | 9.87  | -0.12 | C283 | 18.32 | 5.38  | 9.42 | 0.15  | H151 | 27.81 | 1.82  | 2.99  | 0.11 |
| O68 | 11.89 | 27.76 | 1.65 | -0.58 | C128 | 30.47 | 35.45 | 9.71  | 0.20  | C284 | 18.32 | 9.24  | 9.06 | -0.27 | H152 | 26.75 | 3.65  | 10.10 | 0.11 |
| O69 | 11.92 | 28.03 | 4.18 | -0.58 | C129 | 20.94 | 9.04  | 10.42 | -0.12 | C285 | 0.00  | 11.72 | 1.24 | -0.25 | H153 | 26.74 | 5.69  | 0.62  | 0.11 |
| O70 | 10.91 | 25.74 | 3.12 | -0.52 | C130 | 20.83 | 9.36  | 9.07  | 0.05  | C286 | 0.00  | 8.03  | 1.30 | 0.21  | H154 | 28.15 | 3.94  | 6.99  | 0.12 |
| O71 | 10.28 | 29.53 | 2.67 | -0.56 | C131 | 22.01 | 9.68  | 8.38  | -0.11 | C287 | 0.00  | 12.78 | 3.73 | 0.21  | H155 | 30.44 | 5.73  | 9.85  | 0.13 |
| O72 | 7.22  | 29.02 | 1.09 | -0.78 | C132 | 24.58 | 9.51  | 0.55  | 0.62  | C288 | 0.00  | 9.08  | 3.78 | -0.26 | H156 | 28.80 | 1.85  | 7.71  | 0.11 |
| O73 | 9.10  | 27.67 | 6.97 | -0.77 | C133 | 23.41 | 7.47  | 5.68  | -0.03 | H1   | 20.15 | 27.81 | 0.35 | 0.11  | H157 | 27.92 | 3.88  | 4.05  | 0.12 |
| O74 | 8.89  | 30.21 | 4.29 | -0.58 | C134 | 23.29 | 9.37  | 10.39 | -0.01 | H2   | 21.97 | 26.75 | 7.46 | 0.11  | H158 | 31.02 | 3.60  | 0.07  | 0.12 |
| O75 | 8.62  | 30.24 | 6.82 | -0.58 | C135 | 24.74 | 7.85  | 5.23  | 0.62  | H3   | 24.02 | 26.74 | 8.54 | 0.11  | H159 | 28.17 | 11.11 | 3.56  | 0.42 |

|     |       |       |       |       |      |       |       |       |       |     |       |       |       |      |      |       |       |       |      |
|-----|-------|-------|-------|-------|------|-------|-------|-------|-------|-----|-------|-------|-------|------|------|-------|-------|-------|------|
| O76 | 10.91 | 29.23 | 5.76  | -0.52 | C136 | 23.22 | 9.69  | 9.02  | -0.08 | H4  | 22.26 | 28.15 | 4.35  | 0.12 | H160 | 29.07 | 11.19 | 4.59  | 0.42 |
| O77 | 7.11  | 28.61 | 5.31  | -0.56 | C137 | 22.20 | 7.90  | 5.09  | -0.08 | H5  | 24.05 | 30.44 | 7.21  | 0.13 | H161 | 18.32 | 29.73 | 5.55  | 0.14 |
| O78 | 7.63  | 25.54 | 3.73  | -0.78 | C138 | 19.53 | 9.48  | 8.42  | 0.23  | H6  | 20.17 | 28.80 | 5.07  | 0.11 | H162 | 18.32 | 25.96 | 5.71  | 0.08 |
| O79 | 27.42 | 9.35  | 1.69  | -0.77 | C139 | 23.28 | 6.56  | 6.78  | -0.08 | H7  | 22.20 | 27.92 | 1.41  | 0.12 | H163 | 18.32 | 31.71 | 10.48 | 0.14 |
| O80 | 27.21 | 11.89 | 9.57  | -0.58 | C140 | 20.96 | 7.52  | 5.50  | -0.13 | H8  | 21.93 | 31.02 | 7.99  | 0.13 | H164 | 18.32 | 27.74 | 9.95  | 0.13 |
| O81 | 26.94 | 11.92 | 1.54  | -0.58 | C141 | 22.15 | 9.00  | 0.50  | -0.10 | H9  | 29.43 | 28.17 | 0.92  | 0.42 | H165 | 0.00  | 25.51 | 0.48  | 0.14 |
| O82 | 29.24 | 10.91 | 0.48  | -0.52 | C142 | 20.86 | 6.63  | 6.57  | 0.06  | H10 | 29.51 | 29.07 | 1.96  | 0.42 | H166 | 0.00  | 29.01 | 0.43  | 0.08 |
| O83 | 25.44 | 10.28 | 0.03  | -0.56 | C143 | 22.01 | 6.19  | 7.23  | -0.12 | H11 | 1.82  | 9.48  | 5.63  | 0.11 | H167 | 0.00  | 23.33 | 4.52  | 0.08 |
| O84 | 25.95 | 7.22  | 9.01  | -0.78 | C144 | 19.62 | 6.23  | 7.32  | 0.20  | H12 | 3.65  | 8.42  | 2.18  | 0.11 | H168 | 0.00  | 27.23 | 4.67  | 0.13 |
| O85 | 9.23  | 27.30 | 1.69  | -0.77 | C145 | 2.61  | 27.36 | 5.14  | -0.12 | H13 | 5.69  | 8.42  | 3.26  | 0.11 | H169 | 7.18  | 0.00  | 8.40  | 0.14 |
| O86 | 9.44  | 24.76 | 9.57  | -0.58 | C146 | 2.51  | 27.68 | 3.79  | 0.05  | H14 | 3.94  | 9.83  | 9.63  | 0.12 | H170 | 10.69 | 0.00  | 8.35  | 0.08 |
| O87 | 9.70  | 24.73 | 1.54  | -0.58 | C147 | 3.69  | 28.01 | 3.11  | -0.11 | H15 | 5.73  | 12.12 | 1.93  | 0.13 | H171 | 5.01  | 0.00  | 1.88  | 0.08 |
| O88 | 7.41  | 25.74 | 0.48  | -0.52 | C148 | 6.25  | 27.83 | 5.82  | 0.62  | H16 | 1.85  | 10.47 | 10.34 | 0.11 | H172 | 8.91  | 0.00  | 2.03  | 0.13 |
| O89 | 11.21 | 26.37 | 0.03  | -0.56 | C149 | 5.09  | 25.79 | 0.41  | -0.03 | H17 | 3.88  | 9.60  | 6.69  | 0.12 | H173 | 25.24 | 18.32 | 2.91  | 0.14 |
| O90 | 10.70 | 29.43 | 9.01  | -0.78 | C150 | 4.97  | 27.69 | 5.11  | -0.01 | H18 | 3.60  | 12.69 | 2.71  | 0.12 | H174 | 29.01 | 18.32 | 3.07  | 0.08 |
| O91 | 27.55 | 8.98  | 6.97  | -0.77 | C151 | 6.41  | 26.17 | 10.51 | 0.62  | H19 | 11.11 | 9.84  | 6.20  | 0.42 | H175 | 23.26 | 18.32 | 7.84  | 0.14 |
| O92 | 27.76 | 6.43  | 4.29  | -0.58 | C152 | 4.90  | 28.01 | 3.74  | -0.08 | H20 | 11.19 | 10.75 | 7.23  | 0.42 | H176 | 27.23 | 18.32 | 7.31  | 0.13 |
| O93 | 28.03 | 6.40  | 6.82  | -0.58 | C153 | 3.88  | 26.23 | 10.36 | -0.08 | H21 | 34.82 | 27.17 | 5.63  | 0.11 | H177 | 11.55 | 18.32 | 2.84  | 0.14 |
| O94 | 25.74 | 7.41  | 5.76  | -0.52 | C154 | 1.20  | 27.81 | 3.14  | 0.23  | H22 | 33.00 | 28.23 | 2.18  | 0.11 | H178 | 7.64  | 18.32 | 3.07  | 0.08 |
| O95 | 29.53 | 8.04  | 5.31  | -0.56 | C155 | 4.96  | 24.88 | 1.51  | -0.08 | H23 | 30.96 | 28.23 | 3.26  | 0.11 | H179 | 13.35 | 18.33 | 7.84  | 0.14 |
| O96 | 29.02 | 11.11 | 3.73  | -0.78 | C156 | 2.63  | 25.84 | 0.22  | -0.13 | H24 | 32.71 | 26.82 | 9.63  | 0.12 | H180 | 9.42  | 18.32 | 7.31  | 0.13 |
| C1  | 20.94 | 27.61 | 10.42 | -0.12 | C157 | 3.83  | 27.32 | 5.78  | -0.10 | H25 | 30.92 | 24.53 | 1.93  | 0.13 | H181 | 29.47 | 0.00  | 8.40  | 0.14 |
| C2  | 20.83 | 27.29 | 9.07  | 0.05  | C158 | 2.54  | 24.95 | 1.29  | 0.06  | H26 | 34.80 | 26.18 | 10.34 | 0.11 | H182 | 25.96 | 0.00  | 8.35  | 0.08 |
| C3  | 22.01 | 26.97 | 8.38  | -0.11 | C159 | 3.69  | 24.51 | 1.95  | -0.12 | H27 | 32.77 | 27.05 | 6.69  | 0.12 | H183 | 31.64 | 0.00  | 1.88  | 0.08 |
| C4  | 24.58 | 27.14 | 0.55  | 0.62  | C160 | 1.20  | 24.50 | 1.79  | 0.20  | H28 | 33.04 | 23.95 | 2.71  | 0.12 | H184 | 27.74 | 0.00  | 2.03  | 0.13 |

|     |       |       |       |       |      |       |       |       |       |     |       |       |      |      |      |       |       |       |      |
|-----|-------|-------|-------|-------|------|-------|-------|-------|-------|-----|-------|-------|------|------|------|-------|-------|-------|------|
| C5  | 23.41 | 29.18 | 5.68  | -0.03 | C161 | 34.03 | 9.28  | 5.14  | -0.12 | H29 | 25.54 | 26.80 | 6.20 | 0.42 | H185 | 18.32 | 6.86  | 5.53  | 0.13 |
| C6  | 23.29 | 27.28 | 10.39 | -0.01 | C162 | 34.14 | 8.96  | 3.79  | 0.05  | H30 | 25.46 | 25.90 | 7.23 | 0.42 | H186 | 18.32 | 10.69 | 5.71  | 0.08 |
| C7  | 24.74 | 28.80 | 5.23  | 0.62  | C163 | 32.96 | 8.64  | 3.11  | -0.11 | H31 | 16.50 | 8.84  | 0.35 | 0.11 | H187 | 18.32 | 4.95  | 10.48 | 0.14 |
| C8  | 23.22 | 26.96 | 9.02  | -0.08 | C164 | 30.40 | 8.82  | 5.82  | 0.62  | H32 | 14.67 | 9.90  | 7.46 | 0.11 | H188 | 18.32 | 8.91  | 9.95  | 0.13 |
| C9  | 22.20 | 28.75 | 5.09  | -0.08 | C165 | 31.56 | 10.86 | 0.41  | -0.03 | H33 | 12.63 | 9.90  | 8.54 | 0.11 | H189 | 0.00  | 11.14 | 0.48  | 0.14 |
| C10 | 19.53 | 27.16 | 8.42  | 0.23  | C166 | 31.68 | 8.96  | 5.11  | -0.01 | H34 | 14.38 | 8.50  | 4.35 | 0.12 | H190 | 0.00  | 7.64  | 0.43  | 0.08 |
| C11 | 23.28 | 30.09 | 6.78  | -0.08 | C167 | 30.23 | 10.48 | 10.51 | 0.62  | H35 | 12.60 | 6.21  | 7.21 | 0.13 | H191 | 0.00  | 13.31 | 4.52  | 0.08 |
| C12 | 20.96 | 29.13 | 5.50  | -0.13 | C168 | 31.75 | 8.64  | 3.74  | -0.08 | H36 | 16.47 | 7.85  | 5.07 | 0.11 | H192 | 0.00  | 9.42  | 4.67  | 0.13 |



**Supplementary Table 9.** The simulated parameters of benzene and toluene.

| # Benzene                                    | # Toluene                                  |
|----------------------------------------------|--------------------------------------------|
| # number of atoms                            | # number of atoms                          |
| 12                                           | 12                                         |
| # atomic positions                           | # atomic positions                         |
| 0 C_benz 0.00000000 0.00000000 0.00000000    | 0 C_xyl 0.00000000 0.00000000 0.00000000   |
| 1 C_benz 1.39200000 0.00000000 0.00000000    | 1 C_xyl 1.40000000 0.00000000 0.00000000   |
| 2 C_benz 2.08800000 1.20550736 0.00000000    | 2 C_xyl 2.10000000 1.21243557 0.00000000   |
| 3 C_benz 1.39200051 2.41101443 -0.00119599   | 3 C_xyl 1.40000000 2.42487113 0.00000000   |
| 4 C_benz 0.00000000 2.41101459 -0.00167420   | 4 C_xyl -0.00000000 2.42487113 0.00000000  |
| 5 C_benz -0.69600000 1.20550717 -0.00068061  | 5 C_xyl -0.70000000 1.21243557 0.00000000  |
| 6 H_benz -0.54000000 -0.93530733 0.00044182  | 6 CH3_xyl -0.755000 -1.30769836 0.00000000 |
| 7 H_benz 1.93200000 -0.93530654 0.00129125   | 7 H_xyl 1.94000000 -0.93530744 0.00000000  |
| 8 H_benz 3.16799982 1.20550747 0.00062273    | 8 H_xyl 3.18000000 1.21243557 -0.00000000  |
| 9 H_benz 1.93200056 3.34632183 -0.00125416   | 9 H_xyl 1.94000000 3.36017857 0.00000000   |
| 10 H_benz -0.53999901 3.34632180 -0.00260212 | 10 H_xyl -0.54000000 3.36017857 0.00000000 |
| 11 H_benz -1.77600000 1.20550708 -0.00085731 | 11 H_xyl -1.78000000 1.21243557 0.00000000 |

**Supplementary Table 10.** Fitting parameters of DSLF model for benzene and cyclohexane adsorption isotherms fitting on ZJU-520(Al) at 298 K.

| Parameters                       | Benzene  | Cyclohexane |
|----------------------------------|----------|-------------|
| $Q_{m1}$ (mmol g <sup>-1</sup> ) | 5.01     | 16.58       |
| $b_1$ (kPa <sup>-1</sup> )       | 64691.33 | 0.060       |
| $n$                              | 5.35     | 0.33        |
| $Q_{m2}$ (mmol g <sup>-1</sup> ) | 5.011    | 3.28        |
| $b_2$ (kPa <sup>-1</sup> )       | 64691.33 | 3257771.90  |
| $m$                              | 5.35     | 5.69        |
| $R^2$                            | 0.96     | 0.99        |

## Supplementary References

1. Pei J, *et al.* Dense packing of acetylene in a stable and low-cost metal-organic framework for efficient C<sub>2</sub>H<sub>2</sub>/CO<sub>2</sub> separation. *Angewandte Chemie International Edition* **60**, 25068 – 25074 (2021).
2. Burch NC, *et al.* Water stability and adsorption in metal-organic frameworks. *Chemical Reviews* **114**, 10575 – 10612 (2014).
3. Maddox MW, *et al.* Characterization of MCM-41 using molecular simulation: Heterogeneity effects. *Langmuir* **13**, 1737 – 1745 (1997).
4. Gong L, *et al.* A superhydrophobic and porous polymer adsorbent with large surface area. *Journal of Materials Chemistry A* **9**, 254 – 258 (2021).
5. Yang K, *et al.* Adsorption of volatile organic compounds by metal-organic frameworks MIL-101: Influence of molecular size and shape. *Journal of Hazardous materials* **195**, 124 – 131 (2011).
6. Gao J, *et al.* A microporous hydrogen-bonded organic framework for the efficient capture and purification of propylene. *Angewandte Chemie International Edition* **60**, 20400 – 20406 (2021).
7. Gu XW, *et al.* Immobilization of lewis basic sites into a stable ethane-selective MOF enabling one-step separation of ethylene from a ternary mixture. *Journal of the American Chemical Society* **144**, 2614 – 2623 (2022).
8. Serafin J, *et al.* The new tailored nanoporous carbons from the common polypody (*Polypodium vulgare*): The role of textural properties for enhanced CO<sub>2</sub> adsorption. *Chemical Engineering Journal* **429**, 131751 – 131756 (2022).
9. Toby BH, Von Dreele RB. GSAS-II: The genesis of a modern open-source all purpose crystallography software package. *Journal of Applied Crystallography* **46**, 544 – 549 (2013).
10. Burla MC, *et al.* SIR2004: An improved tool for crystal structure determination and refinement. *Journal of Applied Crystallography* **38**, 381 – 388 (2010).
11. Gandara F, *et al.* High methane storage capacity in aluminum metal-organic

- frameworks. *Journal of the American Chemical Society* **136**, 5271 – 5280 (2014).
12. Sheldrick GM. Shelxt-integrated space-group and crystal-structure determination. *Acta Crystallographica Section A: Foundations and Advances* **71**, 3-8 (2015).
  13. Sheldrick GM. Crystal structure refinement with SHELXL. *Acta Crystallographica Section C-Structural Chemistry* **71**, 3 – 8 (2015).
  14. Dolomanov OV, *et al.* Olex2: A complete structure solution, refinement and analysis program. *Journal of Applied Crystallography* **42**, 339 – 341 (2009).
  15. Chen Z, *et al.* Reticular access to highly porous acs-MOFs with rigid trigonal prismatic linkers for water sorption. *Journal of the American Chemical Society* **141**, 2900 – 2905 (2019).
  16. Spek AL. Structure validation in chemical crystallography. *Acta Crystallographica Section D-Structural Biology* **65**, 148 – 155 (2009).
  17. Dubbeldam D, *et al.* RASPA: Molecular simulation software for adsorption and diffusion in flexible nanoporous materials. *Molecular Simulation* **42**, 81 – 101 (2016).
  18. Widom B. Some topics in the theory of fluids. *The Journal of Chemical Physics* **39**, 2808 – 2812 (1963).
  19. Hu L, *et al.* A novel aluminum-based metal-organic framework with uniform micropores for trace BTEX adsorption. *Angewandte Chemie International Edition* **62**, e202215296 (2023).
  20. Stöhr M, *et al.* Theory and practice of modeling van der Waals interactions in electronic-structure calculations. *Chemical Society Reviews* **48**, 4118 – 4154 (2019).
  21. Grudin S, Redon S. Practical modeling of molecular systems with symmetries. *Journal of Computational Chemistry* **31**, 1799 – 1814 (2010).
  22. Manz TA, Limas NG. Introducing DDEC6 atomic population analysis: Part 1.

- Charge partitioning theory and methodology. *RSC Advances* **6**, 47771 – 47801 (2016).
23. Manz TA, Sholl DS. Chemically meaningful atomic charges that reproduce the electrostatic potential in periodic and nonperiodic materials. *Journal of Chemical Theory and Computation* **6**, 2455 – 2468 (2010).
  24. Gong W, *et al.* Wicking-polarization-induced water cluster size effect on triboelectric evaporation textiles. *Advanced Materials* **33**, 2007352 – 2007363 (2021).
  25. Zhang C, *et al.* Enantiomeric MOF crystals using helical channels as palettes with bright white circularly polarized luminescence. *Advanced Materials* **32**, 2002914 – 2002923 (2020).
  26. Rappe AK, *et al.* UFF, a full periodic table force field for molecular mechanics and molecular dynamics simulations. *Journal of the American Chemical Society* **114**, 10024 – 10035 (1992).
  27. Sasaki K, Yamashita T. Modification and validation of the Dreiding force field for molecular liquid simulations (Dreiding-UT). *Journal of Chemical Information and Modeling* **61**, 1172 – 1179 (2021).
  28. Casewit CJ, *et al.* Application of a universal force field to organic molecules. *Journal of the American Chemical Society* **114**, 10035 – 10046 (1992).
  29. Pang J, *et al.* A porous metal-organic framework with ultrahigh acetylene uptake capacity under ambient conditions. *Nature Communications* **6**, 7575 – 7580 (2015).
  30. Yu X, *et al.* Determination of CH<sub>4</sub>, C<sub>2</sub>H<sub>6</sub> and CO<sub>2</sub> adsorption in shale kerogens coupling sorption-induced swelling. *Chemical Engineering Journal* **410**, 127690 – 127702 (2021).
  31. Mukherjee S, *et al.* Harnessing Lewis acidic open metal sites of metal-organic frameworks: the foremost route to achieve highly selective benzene sorption over cyclohexane. *Chemical Communications* **52**, 8215 – 8218 (2016).

32. Kühne TD, *et al.* CP2K: An electronic structure and molecular dynamics software package-quickstep: Efficient and accurate electronic structure calculations. *The Journal of Chemical Physics* **152**, 7534 – 7542 (2020).
33. VandeVondele J, *et al.* Quickstep: Fast and accurate density functional calculations using a mixed Gaussian and plane waves approach. *Computer Physics Communications* **167**, 103 – 128 (2005).
34. Lu T, Chen F. Multiwfn: A multifunctional wavefunction analyzer. *Journal of Computational Chemistry* **33**, 580 – 592 (2012).
35. Ernzerhof M, Scuseria GE. Assessment of the Perdew-Burke-Ernzerhof exchange-correlation functional. *The Journal of Chemical Physics* **110**, 5029 – 5036 (1999).
36. Paier J, *et al.* The Perdew-Burke-Ernzerhof exchange-correlation functional applied to the G2-1 test set using a plane-wave basis set. *The Journal of Chemical Physics* **122**, 234102 – 234112 (2005).
37. Perdew JP, *et al.* Generalized gradient approximation made simple. *Physical Review Letters* **77**, 3865 – 3868 (1996).
38. He T, *et al.* Trace removal of benzene vapour using double-walled metal-dipyrazolate frameworks. *Nature Materials* **21**, 689 – 695 (2022).
39. Mo Q, *et al.* Engineering single-atom sites into pore-confined nanospaces of porphyrinic metal-organic frameworks for the highly efficient photocatalytic hydrogen evolution reaction. *Journal of the American Chemical Society* **144**, 22747 – 22758 (2022).
40. Mileo PGM, *et al.* Achieving superprotonic conduction with a 2D fluorinated metal-organic framework. *Journal of the American Chemical Society* **140**, 13156 – 13160 (2018).
41. Gan L, *et al.* A highly water-stable meta-carborane-based copper metal-organic framework for efficient high-temperature butanol separation. *Journal of the American Chemical Society* **142**, 8299 – 8311 (2020).

42. Stylianou KC, *et al.* Dimensionality transformation through paddlewheel reconfiguration in a flexible and porous Zn-based metal-organic framework. *Journal of the American Chemical Society* **134**, 20466 – 20478 (2012).
43. Goedecker S, *et al.* Separable dual-space Gaussian pseudopotentials. *Physical Review B* **54**, 1703 – 1710 (1996).
44. Pratik SM, *et al.* Engineering electrical conductivity in stable Zirconium-based PCN-222 MOFs with permanent mesoporosity. *Chemistry of Materials* **32**, 6137 – 6149 (2020).
45. Perdew JP, *et al.* Restoring the density-gradient expansion for exchange in solids and surfaces. *Physical Review Letters* **100**, 136406 – 136414 (2008).
46. Wang Y, *et al.* Construction of fluorinated propane-trap in metal-organic frameworks for record polymer-grade propylene production under high humidity conditions. *Advanced Materials* **35**, 2207955 – 2207963 (2023).
47. Meng R, *et al.* Two-dimensional organic-inorganic heterostructures of in situ-grown layered COF on Ti<sub>3</sub>C<sub>2</sub> MXene nanosheets for lithium-sulfur batteries. *Nano Today* **35**, 100991 – 100102 (2020).
48. Mukherjee S, *et al.* Advances in adsorptive separation of benzene and cyclohexane by metal-organic framework adsorbents. *Coordination Chemistry Reviews* **437**, 213852 – 213865 (2021).
49. Sopianik AA, *et al.* Exceptionally effective benzene/cyclohexane separation using a nitro-decorated metal-organic framework. *Chemical Communications* **56**, 8241 – 8244 (2020).
50. Xie L, *et al.* Metal-organic frameworks for the capture of trace aromatic volatile organic compounds. *Chem* **4**, 1911 – 1927 (2018).
51. Yang K, *et al.* Adsorption of volatile organic compounds by metal-organic frameworks MOF-177. *Journal of Environmental Chemical Engineering* **1**, 713 – 718 (2013).
52. Zhao Z, *et al.* Competitive adsorption and selectivity of benzene and water

- vapor on the microporous metal organic frameworks (HKUST-1). *Chemical Engineering Journal* **259**, 79 – 89 (2015).
53. Jhung SH, *et al.* Microwave synthesis of chromium terephthalate MIL-101 and its benzene sorption ability. *Advanced Materials* **19**, 121 – 124 (2007).
  54. Mullangi D, *et al.* Super-hydrophobic covalent organic frameworks for chemical resistant coatings and hydrophobic paper and textile composites. *Journal of Materials Chemistry A* **5**, 8376 – 8384 (2017).
  55. Han Y, *et al.* Control of the pore chemistry in metal-organic frameworks for efficient adsorption of benzene and separation of benzene/cyclohexane. *Chem* **9**, 739 – 754 (2023).
