# Supplementary material for: Double-walled Al-based MOF with large microporous specific surface area for trace benzene adsorption
Source: PubMed Central journal article supplement (PMC11016061; doi:10.1038/s41467-024-47612-x), 2024-04-13
Supplement: 41467_2024_47612_MOESM3_ESM.pdf [file 41467_2024_47612_MOESM3_ESM.pdf]

## **Description of Additional Supplementary Files**

Supplementary Movie 1

Description: The process of benzene adsorption by ZJU-520(AI).

Supplementary Movie 2

Description: The process of toluene adsorption by ZJU-520(AI).
